# Supplementary material for: Evaluation of learning from Practical Obstetric Multi-Professional Training and its impact on patient outcomes in Australia using Kirkpatrick’s framework: a mixed methods study
Source: PubMed Central journal article supplement — BMJ Open. 2018 Feb 17;8(2):e017451. doi: 10.1136/bmjopen-2017-017451 (PMC5855459; doi:10.1136/bmjopen-2017-017451), 2018-02-17
Supplement: bmjopen-2017-017451.draft_revisions.pdf [file bmjopen-2017-017451.draft_revisions.pdf]

# BMJ Open

BMJ Open is committed to open peer review. As part of this commitment we make the peer review history of every article we publish publicly available.

When an article is published we post the peer reviewers' comments and the authors' responses online. We also post the versions of the paper that were used during peer review. These are the versions that the peer review comments apply to.

The versions of the paper that follow are the versions that were submitted during the peer review process. They are not the versions of record or the final published versions. They should not be cited or distributed as the published version of this manuscript.

BMJ Open is an open access journal and the full, final, typeset and author-corrected version of record of the manuscript is available on our site with no access controls, subscription charges or pay-per-view fees (<http://bmjopen.bmj.com>).

If you have any questions on BMJ Open's open peer review process please email [editorial.bmjopen@bmj.com](mailto:editorial.bmjopen@bmj.com)

# BMJ Open

## Evaluation of learning from Practical Obstetrical Multi-professional Training and its impact on patient outcomes using Kirkpatrick's method

|                                 |                                                                                                                                                                                                                                                    |
|---------------------------------|----------------------------------------------------------------------------------------------------------------------------------------------------------------------------------------------------------------------------------------------------|
| Journal:                        | <i>BMJ Open</i>                                                                                                                                                                                                                                    |
| Manuscript ID                   | bmjopen-2017-017451                                                                                                                                                                                                                                |
| Article Type:                   | Research                                                                                                                                                                                                                                           |
| Date Submitted by the Author:   | 29-Apr-2017                                                                                                                                                                                                                                        |
| Complete List of Authors:       | Kumar, Arunaz<br>Sturrock, Sam<br>Wallace, Euan; Monash University, Obstetrics and Gynaecology<br>Nestel, Debra; Monash University,<br>Lucey, Donna<br>Stoyles, Sally<br>Morgan, Jenny<br>Neil, Peter<br>Schipalius, Michelle<br>Dekoninck, Philip |
| <b>Primary Subject Heading</b>: | Medical education and training                                                                                                                                                                                                                     |
| Secondary Subject Heading:      | Obstetrics and gynaecology                                                                                                                                                                                                                         |
| Keywords:                       | simulation, interprofessional learning, interprofessional education, evaluation, patient outcome                                                                                                                                                   |
|                                 |                                                                                                                                                                                                                                                    |

SCHOLARONE™  
Manuscripts

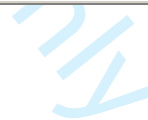

1  
2  
3 **Evaluation of learning from Practical Obstetrical Multi-professional Training and its**  
4  
5 **impact on patient outcomes using Kirkpatrick's method**  
6  
7  
8

9 Arunaz Kumar<sup>1</sup>, Sam Sturrock<sup>1</sup>, Euan M Wallace<sup>1</sup>, Debra Nestel<sup>3</sup>, Donna Lucey<sup>1</sup>, Sally  
10  
11 Stoyles<sup>1</sup>, Jenny Morgan<sup>1</sup>, Peter Neill<sup>1</sup>, Michelle Schlipalius<sup>1, 2</sup>, Philip DeKoninck<sup>1,2</sup>

12  
13 <sup>1</sup>Monash Women's Service, Monash Health, Melbourne, Australia

14  
15 <sup>2</sup>The Ritchie Centre, Hudson Institute of Medical Research, Melbourne, Australia

16  
17 <sup>3</sup>School of Rural Health, Monash University, Melbourne, Australia  
18  
19

20  
21  
22 Running title: Evaluation of PROMPT learning and clinical outcome  
23  
24  
25

26 Corresponding author:  
27

28 Dr Arunaz Kumar  
29

30 Department of Obstetrics and Gynaecology, Monash University  
31

32 Monash Medical Centre, Clayton, Australia  
33  
34

35 Tel: +61395945174  
36

37 Email: arunaz.kumar@monash.edu  
38  
39  
40  
41  
42  
43  
44  
45  
46  
47  
48  
49  
50  
51  
52  
53  
54  
55  
56  
57  
58  
59  
60

## Abstract

### Objectives

- To evaluate the Practical Obstetric Multi-professional Training (PROMPT) simulation using the Kirkpatrick's framework to explore participants' (medical and midwifery teams) acquisition of knowledge and skills and its impact on clinical outcome.
- To explore organisational change to integrate the PROMPT program as a credentialing tool
- To assess participants' perception of usefulness of the PROMPT program in their clinical practice

**Study design** The study follows a mixed methods approach with a pre-test / post-test design

**Setting** Healthcare network providing obstetric care in southeast Victoria, Australia

**Population** Medical and midwifery staff participating in birthing

**Intervention** The intervention is attendance of the PROMPT program, which is a simulation program taught in multidisciplinary teams (medical and midwifery staff) to facilitate teaching emergency obstetric skills.

**Main outcome measure** Clinical outcomes compared for a two-year period before and after embedding PROMPT program in educational practice.

**Secondary outcome measure** Assessment of knowledge gained by participants through a qualitative analysis and description of process of embedding PROMPT in educational practice.

**Results** There was a change in the management of postpartum haemorrhage by early recognition and intervention. The key learning themes described by participants were being prepared with a prior understanding of procedures and equipment, communication, leadership, and learning in a safe, supportive environment. Participants reported a positive learning experience and increase in confidence in managing emergency obstetric situations, through the PROMPT program which was perceived as a realistic demonstration of the emergencies.

1  
2  
3 **Conclusion** Participants reported an improvement of both clinical and non-technical skills  
4 highlighting principles of teamwork, communication, leadership and prioritisation in an  
5 emergency situation. An improvement was observed in management of postpartum  
6 haemorrhage but no significant change was noted in clinical outcomes over a two-year period  
7 after PROMPT. However, the skills acquired by medical and midwifery staff justify  
8 embedding PROMPT in educational programs, the process of which is described here.  
9  
10  
11  
12  
13  
14  
15  
16  
17

18 **Tweetable abstract** Obstetric multiprofessional simulation improves staff learning and  
19 clinical outcome.  
20  
21  
22  
23  
24  
25  
26  
27  
28  
29  
30  
31  
32  
33  
34  
35  
36  
37  
38  
39  
40  
41  
42  
43  
44  
45  
46  
47  
48  
49  
50  
51  
52  
53  
54  
55  
56  
57  
58  
59  
60

## Introduction

Interprofessional team-based, simulated training programs are becoming an increasingly popular to improve the performance of clinical workforce particularly in emergency responses, and resultant clinical outcomes. The provision of high quality birth suite care is no exception. Staff training in technical clinical skills is put to test in complex obstetric situations that require critical time critical management. Team members must be instantly engaged to achieve synergism in managing acute obstetric emergencies. Hence, acquisition of non-technical skills (NTS), such as effective communication and teamwork, are as important as mastering “hands-on” clinical skills<sup>1</sup>.

Interprofessional education (IPE) focuses on “staff members working together to learn *with, from and about* each other”<sup>2</sup>. IPE programs help individuals to develop an understanding of other professional roles within the multidisciplinary team. Such an understanding is thought important for safe and effective clinical practice as a team<sup>3</sup>. In order to maintain a level of confidence in managing these difficult clinical emergencies regular up-skilling sessions are necessary.

PROMPT (PRactical Obstetric Multi-Professional Training) is a multi-professional training package designed to expose participants (obstetricians, midwives, paediatricians and anaesthetists) to obstetric emergencies in a real time environment<sup>4-8</sup>. This simulation-based program aims to recreate clinical problems either “in-situ” in a birth unit or in a simulation centre and presents them to participants as realistically as possible. The scenarios can be designed specifically for the level of the participants and the available facilities. Evaluation of these programs is necessary to assess if their objectives are met. Programs can be evaluated using various frameworks, one of them being the six level modification of Kirkpatrick’s

1  
2  
3 framework<sup>29 10</sup>. The various levels assess participant's satisfaction, change in attitude or  
4 identification of what was learnt, if these skills changed participant behaviour in a clinical  
5 setting or ultimately affected clinical organisational change and patient outcome (see Table 1).  
6  
7  
8  
9

10  
11 We introduced the Victorian state version<sup>11</sup> of the PROMPT program to our maternity  
12 service in 2013. In this study, we aimed to evaluate the impact of PROMPT in our health  
13 service by assessing the various levels in the six-level framework. Specifically, we wished to  
14 identify the "key learning points" acquired, "how" useful this workshop style teaching was  
15 rated and whether there was any evidence of change in patient outcomes. We also describe the  
16 process of "embedding" this program in educational up-skilling of staff.  
17  
18  
19  
20  
21  
22  
23  
24  
25

## 26 **Methods**

### 27 **Study design**

28  
29 The study follows a mixed methods design with quantitative analysis of patient outcome data  
30 and for participant rating of the intervention. The data regarding the key learning messages  
31 was extracted using qualitative content analysis identifying key themes. The study was  
32 approved as a quality assurance project by the institutional research ethics committee.  
33  
34  
35  
36  
37  
38  
39  
40  
41

### 42 **Setting and participants**

43 Monash Health maternity service provides birthing care for over 9000 women annually at  
44 three separate hospital sites, each with different levels of acuity, all within metropolitan  
45 Melbourne, Victoria. The three sites share common clinical practice guidelines, policies and  
46 procedures. Monash Health implemented PROMPT in its current form 2013 onwards across  
47 all sites. Midwifery educators and dedicated senior obstetric medical staff ran the program.  
48 The PROMPT sessions are conducted ten times per year at each site at monthly intervals.  
49  
50  
51  
52  
53  
54  
55  
56  
57  
58  
59  
60

1  
2  
3 Midwifery and medical staff (junior and senior) are required to participate at least every two  
4  
5 years. All medical and midwifery staff who had attended the PROMPT session at least once  
6  
7 were invited to participate in the study.  
8  
9

### 10 11 *PROMPT program scenarios*

12  
13 The half-day program consists of short, interactive lectures and scenario-based drills. Each  
14  
15 drill is followed by a debrief covering clinical and non-technical skills. The clinical scenarios  
16  
17 include eclampsia, shoulder dystocia, neonatal resuscitation and postpartum haemorrhage  
18  
19 (PPH). These are topics that were already covered in the pre-reading material provided to the  
20  
21 participants.  
22  
23

### 24 25 26 *Questionnaires*

27  
28 The evaluation of PROMPT workshop followed a pre-test and a post-test research design  
29  
30 using paper-based questionnaires. Each questionnaire had 26 items where participants'  
31  
32 responses are recorded using a 5-point Likert scale. The pre-test evaluated levels of  
33  
34 knowledge and confidence managing the obstetric emergencies covered. They are also asked  
35  
36 about participants' professional background and experience in these clinical emergencies. At  
37  
38 the end of the workshop the post-test evaluated the satisfaction and learning acquired from the  
39  
40 program. Participants were also asked to reflect on the essential learning points attained that  
41  
42 were thought to be transferable to their (individual or team-based) clinical practice using free  
43  
44 text.  
45  
46  
47  
48  
49

50 Textual data was analysed independently and inductively using content analysis undertaken  
51  
52 by two researchers independently (AK, SS) to produce key themes<sup>12</sup>. The results were  
53  
54 discussed and after establishing consensus, all data were recoded. Some categories overlapped  
55  
56  
57  
58  
59



1  
2  
3 but items were counted only once. Discrepancies were negotiated enabling final attribution of  
4  
5 text within categories.  
6  
7

### 8 9 *Clinical outcome measures*

10  
11 A retrospective cohort study examined all documented cases of the three major obstetric  
12  
13 emergencies covered during the drills (eclampsia, shoulder dystocia combined with neonatal  
14  
15 resuscitation, and post-partum haemorrhage). Data were collected for two different cohorts,  
16  
17 before the implementation of PROMPT (2011-2012) and after (2014-July 2015). Patient  
18  
19 outcomes were evaluated using the following measures. For shoulder dystocia we measured  
20  
21 the use of external and internal manoeuvres, time between delivery of the head and the body,  
22  
23 completion of documentation, major maternal perineal trauma (3<sup>rd</sup> and 4<sup>th</sup> degree tears), and  
24  
25 neonatal outcomes including brachial plexus injury, clavicle or humerus fracture, Apgar score  
26  
27 <7 at 5 minutes, umbilical cord lactates >8 mg/dl, admission to newborn services and  
28  
29 perinatal death. For PPH, we classified women into two groups according to the estimated  
30  
31 volume of blood loss (1000ml-1499ml or  $\geq 1500$ ml) reporting rates of blood transfusion,  
32  
33 transfer to the operating theatre, intravenous fluid resuscitation and use of a (Bakri®) balloon  
34  
35 tamponade.  
36  
37  
38  
39  
40

41  
42 Data was extracted from an electronic database of birthing outcomes, the Birthing Outcomes  
43  
44 System (BOS®) <sup>13</sup>, that records outcomes for all births  $\geq 20$  weeks of gestation and is  
45  
46 routinely entered by midwifery staff. Where necessary BOS data was supplemented by  
47  
48 individual case record review.  
49  
50

### 51 52 *Statistical analysis*

53  
54  
55  
56  
57  
58  
59  
60

1  
2  
3 Data was analysed with Prism for Mac version 7.0a (Graph pad software, San Diego, CA,  
4 USA). Continuous data were expressed as means and standard deviation or medians and  
5 interquartile range (IQR) as appropriate.  
6  
7  
8  
9

## 10 11 **Results**

### 12 ***Participation***

13  
14  
15 Since 2013 we have run 70 PROMPT sessions across our three sites with a total of 508  
16 participants. Approximately one-third (n=178, 35%) of participants were medical staff (junior  
17 and senior). The remaining were midwifery staff (n=287, 56%), medical or midwifery  
18 students (n=34, 7%) or special care nursery staff (n=9, 2%). By 2015, 76% midwives and  
19  
20  
21  
22  
23  
24  
25  
26  
27  
28  
29 90% senior medical staff had participated at least once in PROMPT.

### 30 ***Satisfaction with the simulation activity (Level 1 Kirpatrick's framework)***

31  
32  
33  
34  
35  
36  
37  
38  
39  
40  
41  
42  
43  
44  
45  
46  
47  
48  
49  
50  
51  
52  
53  
54  
55  
56  
57  
58  
59  
60  
Figure 1 summarises the participant knowledge, confidence and prior experience in managing  
obstetric emergency. Staff confidence in management of eclampsia was lower than that for  
the other obstetric emergencies. The confidence and knowledge concerning neonatal  
resuscitation was higher for midwives than the medical staff (Figure 1A and B). In general,  
the workshops were rated highly by both medical and midwifery participants {median Likert  
score of 5 (maximum) for both groups} in regards to clinical usefulness of material covered  
and debriefing experience.

### 61 ***Knowledge acquired from the workshop (Level 2b Kirkpatrick's framework)***

62  
63  
64  
65  
66  
67  
68  
69  
70  
430 comments made by 237 participants were available for content analysis (Table 2). The  
key themes related to improved communication between staff members (n=87), developing  
knowledge of equipment and procedures (78 responses), learning leadership and followership

1  
2  
3 (73 responses), being in a supportive learning environment (63 responses), the realism of the  
4 simulation (48 responses), understanding the roles of staff from another profession (46  
5 responses) and prioritisation of tasks (33 responses).  
6  
7  
8  
9

### 10 11 *Communication*

12  
13 Clear communication established directly with the members of the team (by using the  
14 individual's name) and with others who assist in the process e.g. with switchboard calling an  
15 emergency code. Where appropriate, specific terminology should be used. The loop of  
16 communication should be closed by obtaining a response from the recipient, to ensure  
17 accountability of the individual undertaking the task. The communication was seen to be even  
18 more crucial at certain times like the handover of a task to another member of the team.  
19  
20  
21  
22  
23  
24  
25  
26  
27

### 28 29 *Situational awareness*

30  
31 Identification and knowledge of equipment, its location in the birth unit, organisation of the  
32 equipment and knowing if it was in working order was recognised as relevant for the staff  
33 using it in the emergency situation with time constraints. A prior familiarity of content and a  
34 practice of using the postpartum and eclampsia kit, was found to be essential. Necessary gear  
35 found missing at the time of workshop or kept in the wrong location, delayed the management  
36 and caused stress to the team.  
37  
38  
39  
40  
41  
42  
43  
44  
45

46 Similarly staff members were keen to have a prior awareness of protocols and procedures,  
47 more so in complex situations like eclampsia and neonatal resuscitation and where clinical  
48 manoeuvres were needed like shoulder dystocia and breech vaginal birth. The organisational  
49 pathways needed like calling an emergency code and methods to access operating theatres in  
50 a hurry were also emphasised.  
51  
52  
53  
54  
55  
56  
57  
58  
59  
60

### *Learning leadership and followership*

The importance of leading an emergency team presented as an unexpectedly prominent theme. The key characteristics of a leader were to maintain a “helicopter view” at all times and be clear and assertive with instructions to participants. Establishing and announcing who the leader of the team was (either by the leader or another participant) and appointing one if already not designated. The leader could change during the emergency scenario depending on individual capability and who was available. Handover from one leader to another needed clear communication. In such situations, the new leader should initially “step back” and assimilate the situation prior to taking over.

The rest of the team should patiently wait for instructions, offer to help (based on their individual scope of practice) and contribute to the team management by playing their designated role. If the instructions were unclear or participants were unable to perform the allocated task, they should speak up and close the communication loop.

### *Supportive learning environment*

The PROMPT workshop was acknowledged to improve participants’ confidence and learning of clinical knowledge and skills through individual opportunity to practice and team feedback. In a simulated setting, the technical skills and procedures could be “unpacked” into small steps during the feedback session. The combination of learning emergency skills in a simulated environment was seen as a step towards improving women safety.

### *Realism in simulation*

1  
2  
3 The participants perceived the workshop to be similar to a real emergency through the role of  
4 an actor, scenario design, experiencing stress, working within timelines and location in a birth  
5 unit. The scenarios were based on rare emergencies and followed an unpredictable course  
6  
7 resulting in participants feeling anxious and voiced the need to “stay calm”.  
8  
9  
10

### 11 12 13 *Role of interprofessional staff*

14  
15 Participants displayed a preference to revert to their natural/ usual clinical roles when  
16 managing a clinical emergency as this was based on their strengths and scope of practice. The  
17 participants wanted to have a clear well defined role allocation which was “task specific”.  
18  
19 Both medical and midwifery staff members were keen to share learning in the  
20 interprofessional setting and wanted to understand roles of the other discipline in the team.  
21  
22 Both teams referred to learning teamwork and task sharing.  
23  
24  
25  
26  
27  
28  
29

### 30 31 *Prioritisation*

32  
33 Participants demonstrated a need to organize the tasks systematically and to get help early.  
34  
35 They emphasized on timely escalation of tasks due to their awareness of their limitations in  
36 managing emergency situations and their scope of practice.  
37  
38  
39  
40  
41  
42

### 43 ***Organisational change to “embed” the PROMPT program (Level 4a Kirkpatrick’s*** 44 ***framework)***

45  
46  
47 We describe the process of embedding the PROMPT program using Kurt Lewin’s 3-phase  
48 model<sup>14</sup>.  
49  
50  
51

### 52 53 54 *Step 1 – Unfreeze*

1  
2  
3 The key issue of poor communication (occasionally leading to conflict) among medical and  
4 midwifery staff was recognised through incident reporting as a component of a risk  
5 management process. This was seen to delay mobilising resources required in an emergency  
6 setting, hence compromising optimum patient safety. In a time critical situation, where  
7 effective teamwork is the key, a need to create change was recognised by medical and  
8 midwifery leaders at the institution. The need to change was communicated both to the health  
9 care network executive group and to the clinical staff delivering patient care. This coincided  
10 with introduction of the PROMPT program in the state of Victoria resulting in strategic  
11 inclusion of the team-training program for medical and midwifery staff.  
12  
13  
14  
15  
16  
17  
18  
19  
20  
21  
22  
23

#### 24 *Change*

25  
26 The change described here is embedding the PROMPT program as a component of routine  
27 educational practice. The principles learnt through the program focussed on communication,  
28 leadership and situational awareness, similar to the vision shared by the institution. The  
29 benefits of attending the program were communicated to the staff and feedback encouraged  
30 from participants. Problems that hindered attendance (like rostering issues, managing patient  
31 workload on teaching days) were dealt with promptly. Funding was obtained from the  
32 institution by reporting benefits of change in attitude of interprofessional staff and observed  
33 improvement in performance, although this was not formally evaluated. This funding further  
34 facilitated the operational management of the program, as dedicated clinical staff members  
35 could be employed to sustain the quality of teaching.  
36  
37  
38  
39  
40  
41  
42  
43  
44  
45  
46  
47  
48  
49

#### 50 *Refreeze*

51  
52 The observed improvement in attitudes of the interprofessional staff and effort to meet higher  
53 standards of clinical practice was encouraged. Leadership and operational support required to  
54  
55  
56  
57  
58  
59  
60

1  
2  
3 run the program was improved (by increased numbers of faculty members facilitating the  
4 program) and on-going training support provided to them. A process of providing team-based  
5 feedback was developed (using the PROMPT guidelines) and the role of learning through  
6 PROMPT was formalised which lent itself to its use as credentialing tool. A mandatory  
7 requirement of two-yearly attendance was set up for all medical and midwifery staff.  
8  
9  
10  
11  
12

### 13 14 15 ***Clinical Outcomes (Level 4b Kirkpatrick's framework)***

16  
17 In 2011-2012 there were 15,361 births and in 2014 to July 2015, 12,388 births at Monash  
18 Health.  
19  
20  
21

#### 22 23 24 *Eclampsia*

25  
26 Across the four years, four women had an eclamptic seizure, two in 2011-2012 (0.13/1000)  
27 and two in 2014-2015 (0.16/1000). All four women were managed as per protocol for  
28 Magnesium sulphate infusion.  
29  
30  
31  
32

#### 33 34 35 *Shoulder Dystocia (Table 3)*

36  
37 Table 3 summarises the incidence and outcomes related to shoulder dystocia. The rate of  
38 shoulder dystocia in 2011-12 (n=268; 1.7%) was significantly lower than in 2014-15 (n=290;  
39 2.3%,  $p=0.001$ ) No neonatal deaths were recorded in either group. The interval between  
40 delivery of head and body was shorter in the recent cohort (2.0 min (IQR 1-2) vs 2.0 min  
41 (IQR 1-3),  $p = 0.04$ ). In the cohort after implementation of PROMPT we observed lower  
42 incidences of brachial plexus injury, humerus or clavicle fractures, low Apgar scores and  
43 nursery admissions, although these differences were not statistically significant (Table 3).  
44  
45  
46  
47  
48  
49  
50  
51  
52  
53  
54  
55  
56  
57  
58  
59  
60  
There was a significant decrease in the completion of the required shoulder dystocia  
emergency 'management sheet' (24% vs 17%;  $p = 0.04$ ).

### *Post Partum Haemorrhage (Table 4 and 5)*

For women with a PPH of 1000-1499ml, there was no significant change in the number of cases between cohorts (n=561 (3.7%) vs n=511 (4.1%)), and no significant differences were observed in maternal outcomes or management strategies. For women with a PPH of >1500ml, a significant difference was seen in the number of patients transferred to theatre after vaginal birth (30% vs 38%;  $p = 0.049$ ), and the use of Bakri balloons (6% vs 12%;  $p = 0.02$ ) which were introduced in 2011.

## **Discussion:**

### *Main findings*

Through a formal evaluation of PROMPT and a review of clinical outcomes we have observed that this multidisciplinary training has a positive effect on managing of obstetric emergencies within our service. Consistent with mandatory workforce training requirements, participation of both medical and midwifery staff was excellent across all of our sites such that PROMPT has become an embedded component of ongoing professional development. In this paper we have evaluated our PROMPT program using the various levels of Kirkpatrick's framework, observing encouraging results. All levels examined showed positive effects after implementation of this structured training. In addition, the evaluation allowed us to identify areas for future improvement such as record keeping of therapeutic measures.

Participants found PROMPT an effective approach for the acquisition of new skills and knowledge. Medical and midwifery staff members reported an increase in confidence and had high satisfaction scores on learning as a team (Level 1 Kirkpatrick's framework).



1  
2  
3 Our next level of assessment focussed on key “take-home” learnings acquired by the  
4 participants (Level 2 Kirkpatrick’s framework). Communication and situational awareness  
5 were considered important NTS learnings by the majority of participants and is a finding  
6 consistent with other studies <sup>5,6</sup>. The theme on “leadership” and “following the leader” are  
7 thought critical for safe team-based management, both in simulated and real emergencies <sup>6,15</sup>.  
8  
9 Poor performance in leadership in spite of good communication can also occur <sup>16</sup>, hence,  
10 making leadership an independent learning goal of the workshop. Developing improved  
11 “situational awareness” with knowledge of equipment use and efficient use of team members  
12 is an often -reported learning outcome of the PROMPT program<sup>5</sup>.  
13  
14  
15  
16  
17  
18  
19  
20  
21  
22  
23

24 Our final analysis reviewed the birthing outcome and safety data (Kirkpatrick’s level 4b). In  
25 the recent cohort we observed a significant increase in the incidence of shoulder dystocia.  
26  
27 This could be related to an increased awareness of this condition but could also reflect the  
28 increasing numbers of obese pregnant women delivering at our centres. We observed a small  
29 but statistically significantly difference in the interval between the delivery of head and body,  
30 the clinical relevance of which is debatable. The significant increase in the number of patients  
31 transferred to theatre for control of massive post-partum bleeding (PPH >1500mls), and the  
32 increase in the use of (Bakri) balloon tamponade may reflect a greater awareness of the  
33 benefits of early and aggressive control of excessive bleeding following our PROMPT  
34 implementation, also noted in a recent randomised control trial where the units that  
35 participated in simulation based team training had a higher incidence of blood transfusion and  
36 surgical treatment of PPH <sup>8</sup>.  
37  
38  
39  
40  
41  
42  
43  
44  
45  
46  
47  
48  
49  
50  
51

52 *Strengths and limitations*  
53  
54  
55  
56  
57  
58  
59  
60

1  
2  
3 The current study is one of few mixed methods studies attempting to draw a link between  
4 perceived learning, clinical practice and outcomes by using various levels of Kirkpatrick's  
5 framework. As far as we are aware only a few studies have evaluated simulation-based  
6 intervention through multiple "lenses" of assessment, as reported in a recent review on  
7 obstetric emergencies<sup>17</sup>. Most researchers have limited evaluations to either level 1 or 2 with  
8 some studies demonstrating a change in team behaviour and retention of skills<sup>18</sup>. Studies  
9 looking at clinical outcome are scant<sup>8 11 17</sup>. Our evaluation includes participant satisfaction  
10 with the scenario and debrief (level 1) but also learning skills and knowledge acquired by the  
11 two major interprofessional groups (level 2). We demonstrate the process from introduction of  
12 the intervention and its "embedding" in curricular training and "credentialing" (level 4a). The  
13 PROMPT program has been successfully integrated with teaching programs globally,  
14 however, the description of the program with change management principles is worthy of  
15 sharing. Above all, we have also compared the birthing outcome before and after the  
16 intervention was introduced into practice (Level 4b).

17  
18  
19  
20  
21  
22  
23  
24  
25  
26  
27  
28  
29  
30  
31  
32  
33  
34  
35 However, due to challenges related to study design that entails direct observation of  
36 participants in a "natural" setting, we were unable to assess a change in observed clinical  
37 behaviour/teamwork that may have helped to directly connect workshop learning with clinical  
38 practice, which may be done using clinical checklists<sup>19</sup>.

39  
40  
41  
42  
43  
44  
45  
46 Patient care and clinical outcomes are rarely reported as evidence of effectiveness of  
47 educational programs<sup>20</sup>. Most likely this is because programs need to be embedded prior to  
48 evaluation and coverage of a sufficient proportion of the workforce needs to be achieved  
49 before improved care and outcomes would be expected. This can take many years<sup>21-23</sup>. We  
50 were unable to explore detailed outcome data prior to 2010 as previously documented notes  
51  
52  
53  
54  
55  
56  
57  
58  
59  
60

1  
2  
3 had missing clinically relevant details, hence precluding us from assessing five years before  
4  
5 and after PROMPT which may have provided a better reflection of birthing outcomes.  
6  
7 However, this may not have changed the result as a similar study failed to show a significant  
8  
9 reduction in the composite obstetric outcome in units where multi-professional simulation  
10  
11 training was introduced<sup>8</sup>.  
12

13  
14  
15 A major strength of this evaluation is that it allowed insights into service delivery and  
16  
17 identification of potential deficiencies. For instance, we observed a reduction in the  
18  
19 completion of shoulder dystocia management forms. In addition our current record form lack  
20  
21 certain outcome measures that would be of interest to evaluate clinical management, such as  
22  
23 fluid volume usage during PPH.  
24  
25

### 26 27 28 *Interpretation* 29

30  
31 Participants indicated that communication, situational awareness and leadership skills are key  
32  
33 factors for managing emergencies as a successful team. The next level of evaluation planned  
34  
35 will be to check the team performance in a real obstetric emergency setting to determine if the  
36  
37 transfer of learning has occurred. This can be achieved by integration of level 3 assessment  
38  
39 (behaviour) into our training development strategy by direct observation of performance in a  
40  
41 simulated and/or clinical setting. Apart from more proactive management noted in postpartum  
42  
43 haemorrhage, no significant difference was noted in clinical outcome. This may be due to  
44  
45 existence of previously run simulation programs, which focussed on individual skills but not  
46  
47 on effective teamwork. Although, participants recognise the importance of teamwork and  
48  
49 communication in their learning, this was not transferable to a change in clinical outcome.  
50  
51  
52  
53  
54  
55  
56  
57  
58  
59  
60

1  
2  
3 This evaluation has already resulted in changing the organisational practice at our institution  
4 (Level 4a in the modified Kirkpatrick's six level framework,<sup>24</sup>. An annual attendance of  
5 PROMPT is encouraged for all staff and a two-yearly attendance is a mandatory requirement  
6 for staff working on the birth unit. It is used for credentialing the staff members with  
7 remediation plans for participants unable to meet the expected standards of performance for  
8 both technical and non-technical skills. Our goal will be to continue to strengthen this process  
9 and to formalise it further, linking it with professional development.  
10  
11  
12  
13  
14  
15  
16  
17  
18  
19

## 20 **Conclusions**

21  
22 The study highlights the need for teaching teamwork, communication and leadership skills in  
23 managing obstetric emergencies through a high fidelity simulation program. The impact on  
24 clinical outcomes seems limited, yet we identified some differences related to management of  
25 shoulder dystocia and postpartum haemorrhage that could have made a difference in certain  
26 individual cases. Improved participant confidence with up-skilling of both procedural and  
27 non-technical skills has a potential to change clinical practice and outcomes, hence, validating  
28 the incorporation of these IPE simulation strategies in clinical care.  
29  
30  
31  
32  
33  
34  
35  
36  
37  
38  
39  
40  
41  
42  
43  
44  
45  
46  
47  
48  
49  
50  
51  
52  
53  
54  
55  
56  
57  
58  
59  
60

1  
2  
3 **Acknowledgements:** We would like to thank the birth unit staff across sites at Monash  
4  
5 Health.

6  
7  
8  
9 **Disclosure of interests:** None of the authors have a conflict of interest.

10  
11  
12  
13 **Contribution to authorship:** AK conceived and designed the study, analysed the data, wrote  
14  
15 the first draft of the manuscript and finalised the submission. SS, who is a shared first author  
16  
17 performed the study, analysed the data, edited the manuscript, and approved the final  
18  
19 submission. DL, JM, PN, MS and SS performed the study, and approved the final submission.  
20  
21 EMW conceived and designed the study, contributed to analysis tools, edited and finalised the  
22  
23 submission. DN analysed the data and contributed to analysis tools. PD is the senior author,  
24  
25 conceived, designed, performed and supervised the study, analysed data and approved the  
26  
27 final submission.  
28  
29

30  
31  
32  
33 **Details of ethics approval:**

34  
35 The study was approved by Monash human research ethics committee as a quality assurance  
36  
37 project.  
38

39 **Funding:**

40  
41 No specific funding was obtained for the study.  
42

43 **Data sharing:**

44  
45 There is no other unpublished data from this study  
46

47  
48 Access to the data is available only to the research team in a secure (coded) format  
49

50  
51 Clinical data has been obtained from Birthing Outcome Software (BOS®) and is accessible to  
52  
53 only registered BOS® users in the healthcare network.  
54  
55  
56  
57  
58  
59

## References

1. Leonard M, Graham S, Bonacum D. The human factor: The critical importance of effective teamwork and communication in providing safe care. *Qual Saf Health Care* 2004;**13**(SUPPL. 1):i85-i90.
2. Barr H, Koppel I, Reeves S, et al. *Effective Interprofessional Education: Argument, Assumption and Evidence*: Blackwell Publishing Ltd, 2005.
3. Wong AHW, Gang M, Szyld D, et al. Using a simulation-enhanced interprofessional education strategy to improve attitudes toward teamwork and communication. *Simul Healthc* 2016;**11**(2):117-25.
4. Crofts JF, Ellis D, Draycott TJ, et al. Change in knowledge of midwives and obstetricians following obstetric emergency training: A randomised controlled trial of local hospital, simulation centre and teamwork training. *BJOG Int J Obstet Gynaecol* 2007;**114**(12):1534-41.
5. Siassakos D, Fox R, Bristowe K, et al. What makes maternity teams effective and safe? Lessons from a series of research on teamwork, leadership and team training. *Acta Obstet Gynecol Scand* 2013;**92**(11):1239-43.
6. Siassakos D, Fox R, Crofts JF, et al. The management of a simulated emergency: Better teamwork, better performance. *Resuscitation* 2011;**82**(2):203-06.
7. Siassakos D, Marshall L, Draycott T. Improving collaboration in maternity with interprofessional learning. *J Midwifery Women's Health* 2011;**56**(2):183.
8. Fransen AF, van de Ven J, Schuit E, et al. Simulation-based team training for multi-professional obstetric care teams to improve patient outcome: a multicentre, cluster randomised controlled trial. *BJOG : an international journal of obstetrics and gynaecology* 2016.
9. Hammick M, Freeth D, Koppel I, et al. A best evidence systematic review of interprofessional education: BEME Guide no. 9. *Med Teach* 2007;**29**(8):735-51.
10. Freeth D, Hammick M, Koppel I, et al. *A critical review of evaluations of interprofessional education*. . London: Learning and Support Network, Centre for Health Sciences and Practice., 2002.
11. Shoushtarian M, Barnett M, McMahon F, et al. Impact of introducing Practical Obstetric Multi-Professional Training (PROMPT) into maternity units in Victoria, Australia. *BJOG Int J Obstet Gynaecol* 2014;**121**(13):1710-18.
12. Braun V, Clarke V. Using thematic analysis in psychology. *Qualitative Research in Psychology* 2006;**3**(2):77-101.
13. Bosse HM, Mohr J, Buss B, et al. The benefit of repetitive skills training and frequency of expert feedback in the early acquisition of procedural skills. *BMC Med Educ* 2015;**15**(1).
14. Lewin K. *Frontiers in Group Dynamics: Concept, Method and Reality in Social Science; Social Equilibria and Social Change*. Hum Relat 1947;**1**(1):5-41.
15. Cornthwaite K, Edwards S, Siassakos D. Reducing risk in maternity by optimising teamwork and leadership: An evidence-based approach to save mothers and babies. *Best Pract Res Clin Obstet Gynaecol* 2013;**27**(4):571-81.
16. Cooper S, Cant R, Connell C, et al. Measuring teamwork performance: Validity testing of the Team Emergency Assessment Measure (TEAM) with clinical resuscitation teams. *Resuscitation* 2016;**101**:97-101.
17. Bergh AM, Baloyi S, Pattinson RC. What is the impact of multi-professional emergency obstetric and neonatal care training? *Best Pract Res Clin Obstet Gynaecol* 2015;**29**(8):1028-43.
18. Ameh CA, Van Den Broek N. Making It Happen: Training health-care providers in emergency obstetric and newborn care. *Best Pract Res Clin Obstet Gynaecol* 2015;**29**(8):1077-91.
19. Bajaj K, Rivera-Chiauszi EY, Lee C, et al. Validating Obstetric Emergency Checklists using Simulation: A Randomized Controlled Trial. *American Journal of Perinatology* 2016.
20. Crofts JF, Winter C, Sowter MC. Practical simulation training for maternity care-where we are and where next. *BJOG Int J Obstet Gynaecol* 2011;**118**(SUPPL. 3):11-16.

- 1  
2  
3 21. Gillan C, Lovrics E, Halpern E, et al. The evaluation of learner outcomes in interprofessional  
4 continuing education: A literature review and an analysis of survey instruments. *Med Teach*  
5 2011;**33**(9):e461-e70.  
6 22. Calvert KL, McGurgan PM, Debenham EM, et al. Emergency obstetric simulation training: How do  
7 we know where we are going, if we don't know where we have been? *Aust New Zealand J*  
8 *Obstet Gynaecol* 2013;**53**(6):509-16.  
9 23. Draycott T, Crofts J. Structured team training in obstetrics and its impact on outcome. *Fetal*  
10 *Matern Med Rev* 2006;**17**(3):229-37.  
11 24. Freeth D, Hammick M, Reeves S, et al. *Effective Interprofessional Education: Development,*  
12 *Delivery and Evaluation:* Blackwell Publishing Ltd, 2008.  
13  
14  
15  
16  
17  
18  
19

20 **Table 1: Modified Kirkpatrick's framework (adapted from Barr's six level classification)**

21  
22  
23  
24  
25  
26  
27  
28  
29  
30  
31  
32  
33  
34  
35  
36  
37  
38  
39  
40  
41  
42  
43  
44  
45

|          |                                   |                                                                             |
|----------|-----------------------------------|-----------------------------------------------------------------------------|
| Level 1  | Participant reaction              | Learners' views on the learning experience and its interprofessional nature |
| Level 2a | Change in attitudes               | Changes in attitudes towards team members of the interprofessional groups   |
| Level 2b | Change in knowledge or skills     | Including knowledge and skills related to the interprofessional activity    |
| Level 3  | Behavioural change                | Identify individual transfer of interprofessional learning                  |
| Level 4a | Change in organizational practice | Wider change in organisational practice and delivery of care                |
| Level 4b | Change in clinical outcome        | Improvement in change in patient care                                       |

46  
47 \* Adapted with permission from (Barr, Koppel, Reeves, Hammick, & Freeth, 2005)  
48  
49  
50  
51  
52  
53  
54  
55  
56  
57  
58  
59  
60

**Table 2: Learning acquired from the PROMPT program**

| Theme                                | Responses | Comments                                                                                                                                                                                                                                                                                                                                                                                                                                                                                                                                                              |
|--------------------------------------|-----------|-----------------------------------------------------------------------------------------------------------------------------------------------------------------------------------------------------------------------------------------------------------------------------------------------------------------------------------------------------------------------------------------------------------------------------------------------------------------------------------------------------------------------------------------------------------------------|
| Communication                        | 87        | <p><i>“Allocating task to a certain individual and not to someone!”</i></p> <p><i>“Use closed loop communication”</i></p> <p><i>“Use team members’ names”</i></p> <p><i>“use specific terminology”</i></p> <p><i>“Effective communication between team members leads to effective management”</i></p> <p><i>“Communication becomes even more important in an emergency situation”</i></p> <p><i>“Communication asking who is in charge (of the situation)”</i></p> <p><i>“to ask what's happening for documentation, to tell when obs/anything is to be done”</i></p> |
| Knowledge of equipment and procedure | 78        | <p><i>“Ring 999 only for an emergency CS”</i></p> <p><i>“I learnt where things are kept so they can be accessed immediately in an emergency”</i></p> <p><i>“Familiarity with the ward and procedures to initiate emergency responses”</i></p> <p><i>“Need to spend time learning to hook up the resuscitation cot to the gases in birth rooms”</i></p> <p><i>“using the resusitaire, turning it on and setting O2 + gas”</i></p> <p><i>“familiarise yourself with the content of the emergency”</i></p>                                                               |



|                                                    |                  |                                                                                                                                                                                                                                                                                                                                                                                                                                                                                                                                    |
|----------------------------------------------------|------------------|------------------------------------------------------------------------------------------------------------------------------------------------------------------------------------------------------------------------------------------------------------------------------------------------------------------------------------------------------------------------------------------------------------------------------------------------------------------------------------------------------------------------------------|
|                                                    |                  | <p><i>boxes”</i></p> <p><i>“it was difficult to find the equipment like the IV pump for the simulation. I understand we need to know where these things are, but there were none in any of the spots”</i></p>                                                                                                                                                                                                                                                                                                                      |
| <p><b>Learning leadership and followership</b></p> | <p><b>73</b></p> | <p><i>“Put hand up if free when already completed a task in an emergency situation”</i></p> <p><i>“Its ok to not have a job and wait”</i></p> <p><i>“Learned to identify the importance of clarifying leadership role in every scenario”</i></p> <p><i>“Step in with a helicopter leader role”</i></p> <p><i>“Ask who is the leader/what is going on/what can I do”</i></p> <p><i>“I needed to be more assertive as team leader”</i></p> <p><i>“clear instructions and explicitly determining who the emergency leader is”</i></p> |
| <p><b>Supportive learning environment</b></p>      | <p><b>68</b></p> | <p><i>“useful to practise these things in team prior to the real deal”</i></p> <p><i>“it consolidated training/knowledge that I have come across in pieces”</i></p> <p><i>“it identifies my weaknesses so I can work on them”</i></p> <p><i>“learning about eclampsia and PPH in a relaxed environment”</i></p>                                                                                                                                                                                                                    |

|                                                    |                  |                                                                                                                                                                                                                                                                                                                                                                         |
|----------------------------------------------------|------------------|-------------------------------------------------------------------------------------------------------------------------------------------------------------------------------------------------------------------------------------------------------------------------------------------------------------------------------------------------------------------------|
| <p><b>Realism in simulation</b></p>                | <p><b>48</b></p> | <p><i>“Having a serious actress helped to keep it real”</i></p> <p><i>“Stay calm in a stressful emergency”</i></p> <p><i>“Practical experience of emergencies we don't normally get to manage”</i></p> <p><i>“...hard knowing what you are walking into a situation and having to act - not giving the order of scenarios”</i></p>                                      |
| <p><b>Interprofessional roles and teamwork</b></p> | <p><b>46</b></p> | <p><i>“Teamwork improves working together”</i></p> <p><i>“My specific role as a RMO (junior doctor) in the emergency situation....”</i></p> <p><i>“...taking on roles/tasks that I can do instead of RMO”</i></p> <p><i>“That you could have a small role that makes up effective care”</i></p>                                                                         |
| <p><b>Prioritisation</b></p>                       | <p><b>33</b></p> | <p><i>“(checking) Fetal heart rate during eclamptic fit is not a priority”</i></p> <p><i>“Think of first line of management in a maternity emergency”</i></p> <p><i>“IV fluids very important in PPH, possibly more than drugs”</i></p> <p><i>“the importance of airway and fluid resuscitation”</i></p> <p><i>“The first steps in managing an eclamptic woman”</i></p> |

**Table 3:** Shoulder dystocia

|                                | 2011-2012     | 2014-2015     | <i>p-value</i> |
|--------------------------------|---------------|---------------|----------------|
| Cases                          | 268 (1.7%)    | 290 (2.3%)    | <b>0.001</b>   |
| Live born                      | 268 (100%)    | 290 (100%)    | 1.00           |
| Internal manoeuvres            | 51 (19%)      | 54 (19%)      | 0.91           |
| Interval between head and body | 2.0 (IQR 1-3) | 2.0 (IQR 1-2) | <b>0.04</b>    |
| Brachial plexus injury         | 17 (6%)       | 10 (3%)       | 0.12           |
| Fracture*                      | 14 (5%)       | 7 (2%)        | 0.12           |
| Apgar <7 @ 5min                | 21 (8%)       | 15 (5%)       | 0.31           |
| Lactate >8 mg/dL               | 12 (4%)       | 22 (8%)       | 0.16           |
| Admission SCN/NICU             | 87 (32%)      | 74 (26%)      | 0.08           |
| Major perineal trauma          | 31 (12%)      | 27 (9%)       | 0.41           |
| 3 <sup>rd</sup> degree tear    | 28 (10%)      | 26 (9%)       | 0.48           |
| 4 <sup>th</sup> degree tear    | 3 (1%)        | 1 (0.3%)      | 0.36           |
| Management sheet completed     | 63 (24%)      | 48 (17%)      | <b>0.04</b>    |

\* Humerus or clavicle

**Table 4:** PPH 1000-1499 mL

|                                         | 2011-2012   | 2014-2015  | <i>p-value</i> |
|-----------------------------------------|-------------|------------|----------------|
| Cases                                   | 561 (3.7%)  | 511 (4.1%) | 0.09           |
| LUCS                                    | 196 (35%)   | 176 (34%)  | 0.90           |
| Transfer to theatre after vaginal birth | 65 (12%)    | 76 (15%)   | 0.12           |
| IV access before theatre                | 260 (99.6%) | 252 (100%) | 1.00           |
| Bakri balloon                           | 2 (0.4%)    | 6 (1%)     | 0.16           |
| ICU admission                           | 0           | 3 (0.6%)   | 0.12           |
| RBC transfusion                         | 65 (12%)    | 75 (15%)   | 0.15           |

**Table 5:** PPH >1500mL

|                                         | 2011-2012   | 2014-2015   | <i>p-value</i> |
|-----------------------------------------|-------------|-------------|----------------|
| Cases                                   | 329 (2.2%)  | 287 (2.3%)  | 0.48           |
| LUCS                                    | 101 (31%)   | 64 (22%)    | <b>0.03</b>    |
| Transfer to theatre after vaginal birth | 99 (30%)    | 108 (38%)   | <b>0.049</b>   |
| IV access before theatre                | 199 (99.5%) | 171 (99.4%) | 1.00           |
| Bakri balloon                           | 21 (6%)     | 34 (12%)    | <b>0.02</b>    |
| ICU admission                           | 23 (7%)     | 24 (8.3%)   | 0.55           |
| RBC transfusion                         | 156 (47%)   | 149 (52%)   | 0.29           |

**Figure 1A: Medical Staff**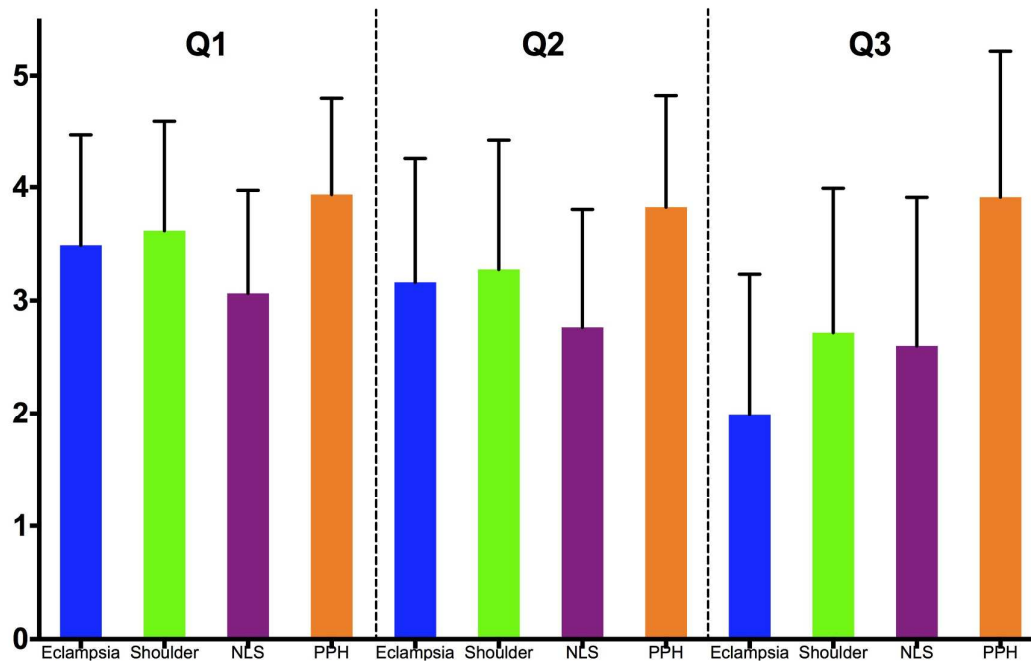

Bar diagrams showing level of knowledge (Q1), confidence (Q2) or prior experience (Q3) of medical staff in dealing with eclampsia, shoulder dystocia, neonatal resuscitation (NLS) and postpartum haemorrhage (PPH).

1-5 on the y-axis denotes likert scale rating, where 5 is the highest rating.

**Figure 1B: Midwifery staff**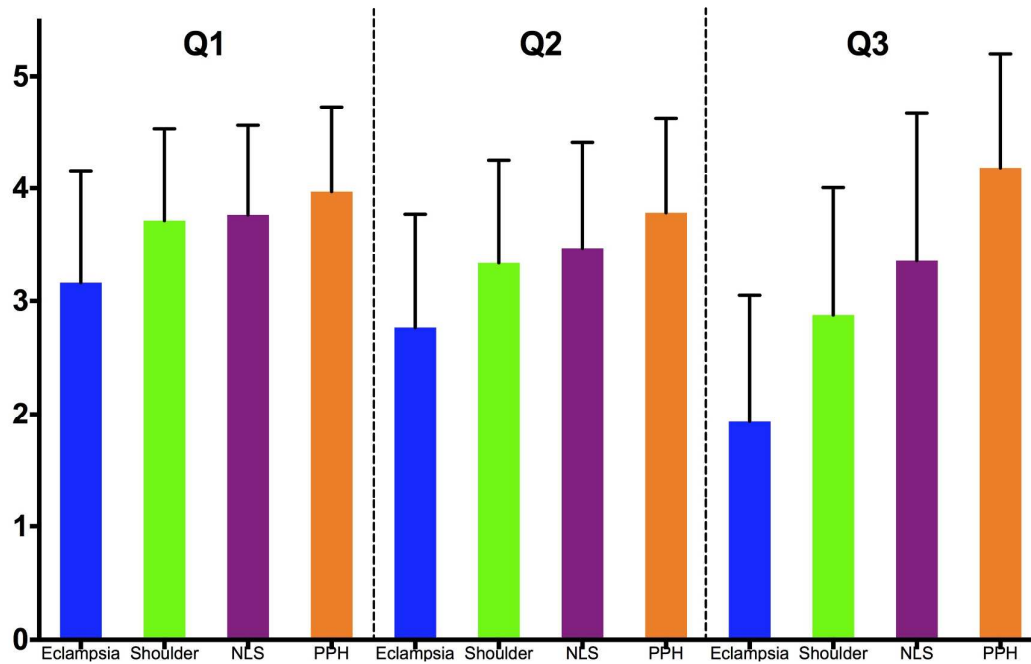

Bar diagrams showing level of knowledge (Q1), confidence (Q2) or prior experience (Q3) of midwifery staff in dealing with eclampsia, shoulder dystocia, neonatal resuscitation (NLS) and postpartum haemorrhage (PPH). 1-5 on the y-axis denotes Likert scale rating, where 5 is the highest rating.

STROBE Statement for PROMPT study  
(Research checklist)

|                    |                                                |                |
|--------------------|------------------------------------------------|----------------|
| Title and Abstract | Study design                                   | Page 2         |
|                    | Summary of the study provided                  | Page 2 and 3   |
| Introduction       | Background                                     | Page 4 and 5   |
|                    | Objectives                                     | Page 5         |
| Methods            | Study design                                   | Page 5         |
|                    | Setting                                        | Page 5 and 6   |
|                    | Eligibility criteria                           | Page 6         |
|                    | Variables (outcome measures)                   | Page 6 and 7   |
|                    | Data sources/measurement                       | Page 7 and 8   |
|                    | Bias                                           | Page 6 and 7   |
|                    | Study size                                     | Page 5,6 and 7 |
|                    | Quantitative variables                         | Page 7 and 8   |
|                    | Statistical analysis                           | Page 7 and 8   |
|                    | Qualitative analysis                           | Page 6 and 7   |
| Results            | Descriptive data - demography                  | Page 8         |
|                    | Main results - Thematic (qualitative) analysis | Page 8-13      |
|                    | Main results - quantitative                    | Page 13 and 14 |
|                    | Other results                                  | Page 8         |
| Discussion         | Key results                                    | Page 14 - 16   |
|                    | Limitations                                    | Page 16 and 17 |
|                    | Interpretation                                 | Page 17 and 18 |
|                    | Generalisability                               | Page 17 and 18 |
|                    | Funding                                        | Page 19        |
|                    |                                                |                |



# BMJ Open

## Evaluation of learning from Practical Obstetrical Multi-Professional Training and its impact on patient outcomes in Australia using Kirkpatrick's method: A mixed methods study

|                                 |                                                                                                                                                                                                                                                    |
|---------------------------------|----------------------------------------------------------------------------------------------------------------------------------------------------------------------------------------------------------------------------------------------------|
| Journal:                        | <i>BMJ Open</i>                                                                                                                                                                                                                                    |
| Manuscript ID                   | bmjopen-2017-017451.R1                                                                                                                                                                                                                             |
| Article Type:                   | Research                                                                                                                                                                                                                                           |
| Date Submitted by the Author:   | 19-Oct-2017                                                                                                                                                                                                                                        |
| Complete List of Authors:       | Kumar, Arunaz<br>Sturrock, Sam<br>Wallace, Euan; Monash University, Obstetrics and Gynaecology<br>Nestel, Debra; Monash University,<br>Lucey, Donna<br>Stoyles, Sally<br>Morgan, Jenny<br>Neil, Peter<br>Schipalius, Michelle<br>Dekoninck, Philip |
| <b>Primary Subject Heading</b>: | Medical education and training                                                                                                                                                                                                                     |
| Secondary Subject Heading:      | Obstetrics and gynaecology                                                                                                                                                                                                                         |
| Keywords:                       | simulation, interprofessional learning, interprofessional education, evaluation, patient outcome                                                                                                                                                   |
|                                 |                                                                                                                                                                                                                                                    |

SCHOLARONE™  
Manuscripts

1  
2  
3 **Evaluation of learning from Practical Obstetrical Multi-Professional Training and its**  
4 **impact on patient outcomes in Australia using Kirkpatrick's framework: A mixed**  
5 **methods study**  
6  
7  
8  
9

10  
11 Arunaz Kumar<sup>1</sup>, Sam Sturrock<sup>1</sup>, Euan M Wallace<sup>1</sup>, Debra Nestel<sup>3</sup>, Donna Lucey<sup>1</sup>, Sally  
12 Stoyles<sup>1</sup>, Jenny Morgan<sup>1</sup>, Peter Neil<sup>1</sup>, Michelle Schlipalius<sup>1,2</sup>, Philip DeKoninck<sup>1,2</sup>  
13  
14  
15

16  
17  
18 <sup>1</sup>Monash Women's Service, Monash Health, Melbourne, Australia

19  
20 <sup>2</sup>The Ritchie Centre, Hudson Institute of Medical Research, Melbourne, Australia

21  
22 <sup>3</sup>School of Rural Health, Monash University, Melbourne, Australia  
23  
24  
25

26  
27 Running title: Evaluation of PROMPT learning and clinical outcomes  
28  
29  
30

31 Corresponding author:

32  
33 Dr Arunaz Kumar

34  
35 Department of Obstetrics and Gynaecology,

36  
37 O and G Education office Level 5, Monash University,

38  
39 Monash Medical Centre, 246 Clayton Road,

40  
41 Clayton, Vic 3168, Australia  
42  
43

44 Tel: +61395945174  
45

46 Email: arunaz.kumar@monash.edu  
47  
48  
49  
50  
51  
52  
53  
54  
55  
56  
57  
58  
59  
60

## Abstract

**Objectives:** The aim of this study was to evaluate the implementation of the Practical Obstetric Multi-Professional Training (PROMPT) simulation using the Kirkpatrick's framework. We explored participants' acquisition of knowledge and skills, its impact on clinical outcomes and organisational change to integrate the PROMPT program as a credentialing tool. We also aimed to assess participants' perception of usefulness of PROMPT in their clinical practice.

**Study design:** Mixed methods approach with a pre-test / post-test design.

**Setting:** Healthcare network providing obstetric care in Victoria, Australia.

**Participants:** Medical and midwifery staff attending PROMPT between 2013 and 2015 (n=508); clinical outcomes were evaluated in two cohorts 2011-2012 (n=15,361 births) and 2014-2015 (n=12,388 births)

**Intervention:** Attendance of the PROMPT program, a simulation program taught in multidisciplinary teams to facilitate teaching emergency obstetric skills.

**Main outcome measure:** Clinical outcomes compared before and after embedding PROMPT in educational practice.

**Secondary outcome measure:** Assessment of knowledge gained by participants through a qualitative analysis and description of process of embedding PROMPT in educational practice.

**Results:** There was a change in the management of postpartum haemorrhage by early recognition and intervention. The key learning themes described by participants were being prepared with a prior understanding of procedures and equipment, communication, leadership, and learning in a safe, supportive environment. Participants reported a positive learning experience and increase in confidence in managing emergency obstetric situations, through the PROMPT program which was perceived as a realistic demonstration of the emergencies.

1  
2  
3 **Conclusion:** Participants reported an improvement of both clinical and non-technical skills  
4 highlighting principles of teamwork, communication, leadership and prioritisation in an  
5 emergency situation. An improvement was observed in management of postpartum  
6 haemorrhage but no significant change was noted in clinical outcomes over a two-year period  
7 after PROMPT. However, the skills acquired by medical and midwifery staff justify  
8 embedding PROMPT in educational programs.  
9  
10  
11  
12  
13  
14  
15  
16  
17

### 18 **Strengths and limitations of the study**

- 19
- 20 • This is one of the few mixed methods studies using multiple levels of Kirkpatrick's
- 21 assessment including data on patient outcome that are rarely reported.
- 22
- 23
- 24 • The evaluation allowed insight into the service delivery and revealed deficiencies that
- 25 could be corrected prospectively.
- 26
- 27
- 28
- 29 • The participants' behaviour could not be studied in either simulation or a clinical setting.
- 30
- 31
- 32
- 33
- 34
- 35
- 36
- 37
- 38
- 39
- 40
- 41
- 42
- 43
- 44
- 45
- 46
- 47
- 48
- 49
- 50
- 51
- 52
- 53
- 54
- 55
- 56
- 57
- 58
- 59
- 60

## Introduction

Interprofessional team-based, simulated training programs are becoming increasingly popular to improve the performance of clinical workforce in emergency responses, and its resultant clinical outcomes. The provision of high quality birth suite care is no exception. Staff training in technical clinical skills is put to test in complex obstetric situations that require time critical management. Team members must be instantly engaged to achieve synergism in managing acute obstetric emergencies. Hence, acquisition of non-technical skills (NTS), such as effective communication and teamwork, are as important as mastering “hands-on” clinical skills.<sup>1</sup>

Interprofessional education (IPE) focuses on “staff members working together to learn *with, from and about* each other”.<sup>2</sup> IPE programs help individuals to develop an understanding of other professional roles within the multidisciplinary team. Such an understanding is thought important for safe and effective clinical practice as a team.<sup>3</sup> In order to maintain a level of confidence in managing these difficult clinical emergencies regular up-skilling sessions are necessary.

PROMPT (PRactical Obstetric Multi-Professional Training) is a multi-professional training package designed to expose participants (obstetricians, midwives, paediatricians and anaesthetists) to obstetric emergencies in a real time environment.<sup>4-8</sup> This simulation-based program aims to recreate clinical problems either “in-situ” in a birth unit or in a simulation centre and presents them to participants as realistically as possible. The scenarios can be designed specifically for the level of the participants and the available facilities. Evaluation of these programs is necessary to assess if their objectives are met. Programs can be evaluated using various frameworks, one of them being the six level modification of Kirkpatrick’s

1  
2  
3 framework.<sup>2 9 10</sup> The various levels assess participant's satisfaction, change in attitude or  
4 identification of what was learnt, if these skills changed participant behaviour in a clinical  
5 setting or ultimately affected clinical organisational change and patient outcomes (see Table  
6  
7  
8  
9 1).

10  
11  
12  
13 We introduced the Victorian state version of the PROMPT program to our maternity service  
14 in 2013.<sup>11</sup> In this study, we aimed to evaluate the impact of PROMPT in our health service by  
15 assessing the various levels in the six-level framework. Specifically, we wished to identify the  
16 "key learning points" acquired, "how" useful this workshop style teaching was rated and  
17 whether there was any evidence of change in patient outcomes. We also describe the process  
18 of "embedding" this program in educational up-skilling of staff.  
19  
20  
21  
22  
23  
24  
25  
26  
27

## 28 **Methods**

### 29 **Study design**

30  
31 The study follows a mixed methods design with quantitative analysis of patient outcome data  
32 and for participant rating of the intervention. The data regarding the key learning messages  
33 was extracted using qualitative content analysis identifying key themes. The study was  
34 approved as a quality assurance project by the institutional research ethics committee.  
35  
36  
37  
38  
39  
40  
41  
42  
43

### 44 **Setting and participants**

45  
46 Monash Health maternity service provides birthing care for over 9000 women annually at  
47 three separate hospital sites, each with different levels of acuity, all within metropolitan  
48 Melbourne, Victoria. The three sites share common clinical practice guidelines, policies and  
49 procedures. Monash Health implemented the PROMPT program in its current format across  
50 all its sites since 2013. Midwifery educators and dedicated senior obstetric medical staff run  
51  
52  
53  
54  
55  
56  
57  
58  
59  
60

1  
2  
3 the program. The PROMPT sessions are conducted ten times per year at each site at monthly  
4 intervals. Midwifery and medical staff (junior and senior) are required to participate at least  
5 every two years. All medical and midwifery staff who had attended the PROMPT session at  
6 least once between 2013 and 2015 were invited to participate in the study.  
7  
8  
9

### 10 11 12 13 *PROMPT program scenarios*

14  
15 The half-day program consists of short, interactive lectures and scenario-based drills. Each  
16 drill is followed by a debrief covering clinical and non-technical skills. The clinical scenarios  
17 include eclampsia, shoulder dystocia, neonatal resuscitation and postpartum haemorrhage  
18 (PPH). These are topics that were already covered in the pre-reading material provided to the  
19 participants.  
20  
21  
22  
23  
24  
25  
26  
27

### 28 29 *Questionnaires*

30  
31 The evaluation of the PROMPT workshop followed a pre-test and a post-test research design  
32 using paper-based questionnaires. The questionnaires were drafted, revised and agreed upon  
33 by the PROMPT committee (represented by both medical and midwifery educators) to  
34 establish content validity. The questionnaires had been pilot tested in a home birth based  
35 simulation program (in a different participant group that included home birth midwives) at  
36 Monash Health and results published in a peer reviewed journal.<sup>12</sup> Each questionnaire had 26  
37 items where participants' responses are recorded using a 5-point Likert scale. The pre-test  
38 evaluated levels of knowledge and confidence managing the obstetric emergencies covered.  
39 They are also asked about participants' professional background and experience in these  
40 clinical emergencies. At the end of the workshop the post-test evaluated the satisfaction and  
41 learning acquired from the program. Participants were also asked to reflect on the essential  
42  
43  
44  
45  
46  
47  
48  
49  
50  
51  
52  
53  
54  
55  
56  
57  
58  
59  
60

1  
2  
3 learning points attained that were thought to be transferable to their (individual or team-based)  
4  
5 clinical practice using free text.  
6  
7

8  
9 Textual data were analysed independently and inductively using content analysis undertaken  
10  
11 by two researchers independently (AK, SS) to produce key themes.<sup>13</sup> The results were  
12  
13 discussed and after establishing consensus, all data were recoded. Some categories overlapped  
14  
15 but items were counted only once. Discrepancies were negotiated enabling final attribution of  
16  
17 text within categories.  
18  
19

### 20 21 22 *Clinical outcome measures* 23

24 A retrospective cohort study examined all documented cases of the three major obstetric  
25  
26 emergencies covered during the drills (eclampsia, shoulder dystocia combined with neonatal  
27  
28 resuscitation, and post-partum haemorrhage). Clinical outcomes were evaluated in two  
29  
30 cohorts: before the implementation of PROMPT in 2011-2012 (n=15,361 births) and after the  
31  
32 implementation of PROMPT in 2014-2015 (n=12,388 births). Patient outcomes were  
33  
34 evaluated using the following measures. For shoulder dystocia we measured the use of  
35  
36 external and internal manoeuvres, time between delivery of the head and the body, completion  
37  
38 of documentation, major maternal perineal trauma (3<sup>rd</sup> and 4<sup>th</sup> degree tears), and neonatal  
39  
40 outcomes including brachial plexus injury, clavicle or humerus fracture, Apgar score <7 at 5  
41  
42 minutes, umbilical cord lactates >8 mg/dl, admission to newborn services and perinatal death.  
43  
44 For PPH, we classified women into two groups according to the estimated volume of blood  
45  
46 loss (1000ml-1499ml or >=1500ml) reporting rates of blood transfusion, transfer to the  
47  
48 operating theatre, intravenous fluid resuscitation and use of a (Bakri®) balloon tamponade.  
49  
50  
51  
52  
53  
54  
55  
56  
57  
58  
59  
60



1  
2  
3 Data were extracted from an electronic database of birthing outcomes, the Birthing Outcomes  
4 System (BOS®), that records outcomes for all births  $\geq 20$  weeks of gestation and is routinely  
5 entered by midwifery staff.<sup>14</sup> Where necessary BOS data was supplemented by individual  
6 case record review.  
7  
8  
9

### 10 11 12 13 *Statistical analysis*

14  
15 Data were analysed with Prism for Mac version 7.0a (Graph pad software, San Diego, CA,  
16 USA). Continuous data were expressed as means and standard deviation or medians and  
17 interquartile range (IQR) as appropriate.  
18  
19  
20  
21  
22

## 23 24 **Results**

### 25 26 *Participation*

27  
28 Since 2013 we have run 70 PROMPT sessions across our three sites with a total of 508  
29 participants. Approximately one-third (n=178, 35%) of participants were medical staff (junior  
30 and senior). The remaining were midwifery staff (n=287, 56%), medical or midwifery  
31 students (n=34, 7%) or special care nursery staff (n=9, 2%). By 2015, 76% midwives and  
32 90% senior medical staff had participated at least once in PROMPT.  
33  
34  
35  
36  
37  
38  
39  
40

### 41 42 *Satisfaction with the simulation activity (Level 1 Kirkpatrick's framework)*

43  
44 Figure 1 summarises the participant knowledge, confidence and prior experience in managing  
45 obstetric emergencies. Staff confidence in management of eclampsia was lower than that for  
46 the other obstetric emergencies. The confidence and knowledge concerning neonatal  
47 resuscitation was higher for midwives than the medical staff (Figure 1). In general, the  
48 workshops were rated highly by both medical and midwifery participants (median Likert  
49  
50  
51  
52  
53  
54  
55  
56  
57  
58  
59  
60

1  
2  
3 score of 5 (maximum) for both groups) in regards to clinical usefulness of material covered  
4  
5 and debriefing experience.  
6  
7

8  
9 ***Knowledge acquired from the workshop (Level 2b Kirkpatrick's framework)***

10  
11 430 comments made by 237 participants were available for content analysis (Table 2). The  
12  
13 key themes related to improved communication between staff members (n=87), developing  
14  
15 knowledge of equipment and procedures (78 responses), learning leadership and followership  
16  
17 (73 responses), being in a supportive learning environment (63 responses), the realism of the  
18  
19 simulation (48 responses), understanding the roles of staff from another profession (46  
20  
21 responses) and prioritisation of tasks (33 responses).  
22  
23  
24  
25

26 ***Communication***

27  
28 Clear communication established directly with the members of the team (by using the  
29  
30 individual's name) and with others who assist in the process e.g. with switchboard calling an  
31  
32 emergency code. Where appropriate, specific terminology should be used. The loop of  
33  
34 communication should be closed by obtaining a response from the recipient, to ensure  
35  
36 accountability of the individual undertaking the task. The communication was seen to be even  
37  
38 more crucial at certain times like the handover of a task to another member of the team.  
39  
40  
41  
42

43 ***Situational awareness***

44  
45 Identification and knowledge of equipment, its location in the birth unit, organisation of the  
46  
47 equipment and knowing if it was in working order was recognised as relevant for the staff  
48  
49 using it in an emergency with time constraints. A prior familiarity of content and a practice of  
50  
51 using the postpartum and eclampsia kit, was found to be essential. Necessary gear found  
52  
53  
54  
55  
56  
57  
58  
59  
60

1  
2  
3 missing at the time of workshop or kept in the wrong location, delayed the management and  
4  
5 caused stress to the team.  
6  
7

8  
9 Similarly staff members were keen to have a prior awareness of protocols and procedures,  
10  
11 more so in complex situations like eclampsia and neonatal resuscitation and where clinical  
12  
13 manoeuvres were needed like shoulder dystocia. The organisational pathways needed like  
14  
15 calling an emergency code and methods to access operating theatres in an emergency were  
16  
17 also emphasised.  
18  
19

### 20 21 22 *Learning leadership and followership*

23  
24 The importance of leading an emergency team presented as an unexpectedly prominent theme.  
25  
26 The key characteristics of a leader were to maintain a “helicopter view” at all times and be  
27  
28 clear and assertive with instructions to participants. Establishing and announcing who the  
29  
30 leader of the team was (either by the leader or another participant) and appointing one if  
31  
32 already not designated. The leader could change during the emergency scenario depending on  
33  
34 individual capability and who was available. Handover from one leader to another needed  
35  
36 clear communication. In such situations, the new leader should initially “step back” and  
37  
38 assimilate the situation prior to taking over.  
39  
40  
41  
42

43  
44 The rest of the team should patiently wait for instructions, offer to help (based on their  
45  
46 individual scope of practice) and contribute to the team management by playing their  
47  
48 designated role. If the instructions were unclear or participants were unable to perform the  
49  
50 allocated task, they should speak up and close the communication loop.  
51  
52

### 53 54 55 *Supportive learning environment*

1  
2  
3 The PROMPT workshop was acknowledged to improve participants' confidence and learning  
4 of clinical knowledge and skills through individual opportunity to practice and team feedback.  
5  
6 In a simulated setting, the technical skills and procedures could be “unpacked” into small  
7 steps during the feedback session. The combination of learning emergency skills in a  
8 simulated environment was seen as a step towards improving women safety.  
9  
10  
11  
12

### 13 14 15 16 *Realism in simulation*

17  
18 The participants perceived the workshop to be similar to a real emergency through the role of  
19 an actor, scenario design, experiencing stress, working within timelines and location in a birth  
20 unit. The scenarios were based on rare emergencies and followed an unpredictable course  
21 resulting in participants feeling anxious and voiced the need to “stay calm”.  
22  
23  
24  
25  
26  
27

### 28 29 *Role of interprofessional staff*

30  
31 Participants displayed a preference to revert to their natural/ usual clinical roles when  
32 managing a clinical emergency as this was based on their strengths and scope of practice. The  
33 participants wanted to have a clear well defined role allocation which was “task specific”.  
34  
35 Both medical and midwifery staff members were keen to share learning in the  
36 interprofessional setting and wanted to understand roles of the other discipline in the team.  
37  
38 Both teams referred to learning teamwork and task sharing.  
39  
40  
41  
42  
43  
44  
45

### 46 47 *Prioritisation*

48  
49 Participants demonstrated a need to organize the tasks systematically and to get help early.  
50  
51 They emphasized on timely escalation of tasks due to their awareness of their limitations in  
52 managing emergency situations and their scope of practice.  
53  
54  
55  
56  
57  
58  
59  
60

1  
2  
3 ***Organisational change to “embed” the PROMPT program (Level 4a Kirkpatrick’s***  
4 ***framework)***  
5

6  
7 We describe the process of embedding the PROMPT program using Kurt Lewin’s 3-phase  
8  
9 model.<sup>15</sup>  
10

11  
12  
13 *Step 1 - Unfreeze*  
14

15  
16 The key issue of poor communication (occasionally leading to conflict) among medical and  
17  
18 midwifery staff was recognised through incident reporting as a component of a risk  
19  
20 management process. This was seen to delay mobilising resources required in an emergency  
21  
22 setting, hence compromising optimum patient safety. In a time critical situation, where  
23  
24 effective teamwork is the key, a need to create change was recognised by medical and  
25  
26 midwifery leaders at the institution. The need to change was communicated both to the health  
27  
28 care network executive group and to the clinical staff delivering patient care. This coincided  
29  
30 with introduction of the PROMPT program in the state of Victoria resulting in strategic  
31  
32 inclusion of the team-training program for medical and midwifery staff.  
33  
34  
35  
36

37 *Step 2 - Change*  
38

39  
40 The change described here is embedding the PROMPT program as a component of routine  
41  
42 educational practice. The principles learnt through the program focussed on communication,  
43  
44 leadership and situational awareness, similar to the vision shared by the institution. The  
45  
46 benefits of attending the program were communicated to the staff and feedback encouraged  
47  
48 from participants. Problems that hindered attendance (like rostering issues, managing patient  
49  
50 workload on teaching days) were dealt with promptly. Funding was obtained from the  
51  
52 institution by reporting benefits of change in attitude of interprofessional staff and observed  
53  
54 improvement in performance, although this was not formally evaluated. This funding further  
55  
56  
57  
58  
59  
60

1  
2  
3 facilitated the operational management of the program, as dedicated clinical staff members  
4  
5 could be employed to sustain the quality of teaching.  
6  
7

### 8 9 *Step 3 - Refreeze*

10  
11 The observed improvement in attitudes of the interprofessional staff and effort to meet higher  
12  
13 standards of clinical practice was encouraged. Leadership and operational support required to  
14  
15 run the program was improved (by increasing the numbers of faculty members facilitating the  
16  
17 program) and on-going training support provided to them. A process of providing team-based  
18  
19 feedback was developed (using the PROMPT guidelines) and the role of learning through  
20  
21 PROMPT was formalised which lent itself to its use as credentialing tool. A mandatory  
22  
23 requirement of two-yearly attendance was set up for all medical and midwifery staff.  
24  
25  
26  
27

### 28 29 ***Clinical Outcomes (Level 4b Kirkpatrick's framework)***

30  
31 In 2011-2012 there were 15,361 births and in 2014-2015, 12,388 births at Monash Health.  
32  
33  
34

### 35 36 *Eclampsia*

37  
38 Across the four years, four women had an eclamptic seizure, two in 2011-2012 (0.13/1000)  
39  
40 and two in 2014-2015 (0.16/1000). All four women were managed as per local protocol.  
41  
42  
43

### 44 45 *Shoulder Dystocia (Table 3)*

46  
47 Table 3 summarises the incidence and outcomes related to shoulder dystocia. The rate of  
48  
49 shoulder dystocia in 2011-12 (n=268; 1.7%) was significantly lower than in 2014-15 (n=290;  
50  
51 2.3%,  $p=0.001$ ) No neonatal deaths were recorded in either group. The interval between  
52  
53 delivery of head and body was shorter in the recent cohort (2.0 min (IQR 1-2) vs 2.0 min  
54  
55 (IQR 1-3),  $p = 0.04$ ). In the cohort after implementation of PROMPT we observed lower  
56  
57  
58  
59  
60

1  
2 incidences of brachial plexus injury, humerus or clavicle fractures, low Apgar scores and  
3 nursery admissions, although these differences were not statistically significant (Table 3).  
4  
5 There was a significant decrease in the completion of the required shoulder dystocia  
6 emergency 'management sheet' (24% vs 17%;  $p = 0.04$ ).  
7  
8  
9  
10

#### 11 12 13 *Post Partum Haemorrhage (Table 4 and 5)*

14  
15 For women with a PPH of 1000-1499ml, there was no significant change in the number of  
16 cases between cohorts [n=561 (3.7%) vs n=511 (4.1%)], and no significant differences were  
17 observed in maternal outcomes or management strategies. For women with a PPH of  
18 >1500ml, a significant difference was seen in the number of patients transferred to theatre  
19 after vaginal birth (30% vs 38%;  $p = 0.049$ ), and the use of Bakri balloons (6% vs 12%;  $p =$   
20 0.02) which were introduced in 2011.  
21  
22  
23  
24  
25  
26  
27  
28  
29  
30

## 31 **Discussion**

### 32 *Main findings*

33  
34 Through a formal evaluation of PROMPT and a review of clinical outcomes we have  
35 observed that this multidisciplinary training has a positive effect on managing of obstetric  
36 emergencies within our service. Consistent with mandatory workforce training requirements,  
37 participation of both medical and midwifery staff was excellent across all of our sites such  
38 that PROMPT has become an embedded component of ongoing professional development. In  
39 this paper we have evaluated our PROMPT program using the various levels of Kirkpatrick's  
40 framework, observing encouraging results. All levels examined showed positive effects after  
41 implementation of this structured training. In addition, the evaluation allowed us to identify  
42 areas for future improvement such as record keeping of therapeutic measures.  
43  
44  
45  
46  
47  
48  
49  
50  
51  
52  
53  
54  
55  
56  
57  
58  
59  
60

1  
2  
3 Participants found PROMPT an effective approach for the acquisition of new skills and  
4  
5 knowledge. Medical and midwifery staff members reported an increase in confidence and had  
6  
7 high satisfaction scores on learning as a team (Level 1 Kirkpatrick's framework).  
8

9  
10 Our next level of assessment focussed on key "take-home" learnings acquired by the  
11  
12 participants (Level 2 Kirkpatrick's framework). Communication and situational awareness  
13  
14 were considered important NTS learnings by the majority of participants and is a finding  
15  
16 consistent with other studies.<sup>5 6</sup> The theme on "leadership" and "following the leader" are  
17  
18 thought critical for safe team-based management, both in simulated and real emergencies.<sup>6 16</sup>  
19  
20 Poor performance in leadership despite good communication can also occur, hence, making  
21  
22 leadership an independent learning goal of the workshop.<sup>17</sup> Developing improved "situational  
23  
24 awareness" with knowledge of equipment use and efficient use of team members is an often -  
25  
26 reported learning outcome of the PROMPT program.<sup>5</sup>  
27  
28  
29  
30

31  
32 Our final analysis reviewed the birthing outcome and safety data (Kirkpatrick's level 4b). In  
33  
34 the recent cohort we observed a significantly increased incidence of shoulder dystocia. This  
35  
36 could be related to an increased awareness of this condition but could also reflect the  
37  
38 increasing numbers of obese pregnant women delivering at our centres. We observed a small  
39  
40 but statistically significant difference in the interval between the delivery of head and body,  
41  
42 the clinical relevance of which is debatable. These could be assessed individually using case  
43  
44 reviews and learning gaps addressed through clinical case review meetings. The significant  
45  
46 increase in the number of patients transferred to theatre for control of massive post-partum  
47  
48 bleeding (PPH >1500mls), and the increase in the use of (Bakri) balloon tamponade may  
49  
50 reflect a greater awareness of the benefits of early and aggressive control of excessive  
51  
52 bleeding following our PROMPT implementation. This was also noted in a recent randomised  
53  
54  
55  
56  
57  
58  
59  
60



1  
2  
3 control trial where the units that participated in simulation based team training had a higher  
4  
5 incidence of blood transfusion and surgical treatment of PPH.<sup>8</sup>  
6  
7

### 8 9 *Strengths and limitations*

10  
11 The current study is one of few mixed methods studies attempting to draw a link between  
12  
13 perceived learning, clinical practice and outcomes by using various levels of Kirkpatrick's  
14  
15 framework. As far as we are aware only a few studies have evaluated simulation-based  
16  
17 intervention through multiple "lenses" of assessment, as reported in a recent review on  
18  
19 obstetric emergencies.<sup>18</sup> Most researchers have limited evaluations to either level 1 or 2 with  
20  
21 some studies demonstrating a change in team behaviour and retention of skills.<sup>19</sup> Studies  
22  
23 looking at clinical outcome are scant.<sup>8 11 18 20</sup> Our evaluation includes participant satisfaction  
24  
25 with the scenario and debrief (level 1) but also learning skills and knowledge acquired by the  
26  
27 two major interprofessional groups (level 2). We demonstrate the process from introduction of  
28  
29 the intervention and its "embedding" in curricular training and "credentialing" (level 4a). The  
30  
31 PROMPT program has been successfully integrated with teaching programs globally,  
32  
33 however, the description of the program with change management principles is worthy of  
34  
35 sharing. Above all, we have also compared the birthing outcome before and after the  
36  
37 intervention was introduced into practice (Level 4b).  
38  
39  
40  
41  
42  
43

44 However, due to challenges related to study design that entails direct observation of  
45  
46 participants in a "natural" setting, we were unable to assess a change in observed clinical  
47  
48 behaviour/teamwork that may have helped to directly connect workshop learning with clinical  
49  
50 practice, which may be done using clinical checklists.<sup>21</sup>  
51  
52  
53  
54  
55  
56  
57  
58  
59  
60

1  
2  
3 Patient care and clinical outcomes are rarely reported as evidence of effectiveness of  
4 educational programs.<sup>22</sup> Most likely this is because programs need to be embedded prior to  
5 evaluation and coverage of a sufficient proportion of the workforce needs to be achieved  
6 before improved care and outcomes would be expected. This can take many years.<sup>23-25</sup> An  
7 evaluation of the PROMPT program elsewhere, demonstrated a significant decrease in  
8 brachial plexus injury, incidence of pH less than 7, and a reduction of hypoxic ischemic  
9 encephalopathy by 50% when assessed over a 7-year interval.<sup>20</sup> We were unable to explore  
10 detailed outcome data prior to 2010 as previously documented notes had missing clinically  
11 relevant details, hence precluding us from assessing five years before and after PROMPT  
12 which may have provided a better reflection of birthing outcomes. However, this may not  
13 have changed the result as a similar study failed to show a significant reduction in the  
14 composite obstetric outcome in units where multi-professional simulation training was  
15 introduced.<sup>8</sup>

16  
17  
18  
19  
20  
21  
22  
23  
24  
25  
26  
27  
28  
29  
30  
31  
32  
33 A major strength of this evaluation is that it allowed insights into service delivery and  
34 identification of potential deficiencies. For instance, we observed a reduction in the  
35 completion of shoulder dystocia management forms. In addition our current record form lack  
36 certain outcome measures that would be of interest to evaluate clinical management, such as  
37 fluid volume usage during PPH.  
38  
39  
40  
41  
42  
43  
44  
45

#### 46 *Interpretation*

47  
48 Participants indicated that communication, situational awareness and leadership skills are key  
49 factors for managing emergencies as a successful team. The next level of evaluation planned  
50 will be to check the team performance in a real obstetric emergency setting to determine if the  
51 transfer of learning has occurred. This can be achieved by integration of level 3-assessment  
52  
53  
54  
55  
56  
57  
58  
59  
60

1  
2  
3 (behaviour) into our training development strategy by direct observation of performance in a  
4 simulated and/or clinical setting. Apart from more proactive management noted in postpartum  
5 haemorrhage, no significant difference was noted in clinical outcome. This may be due to  
6 existence of previously run simulation programs, which focussed on individual skills but not  
7 on effective teamwork. Although, participants recognise the importance of teamwork and  
8 communication in their learning, this was not transferable to a change in clinical outcome.  
9  
10  
11  
12  
13  
14  
15

16  
17  
18 This evaluation has already resulted in changing the organisational practice at our institution  
19 (Level 4a).<sup>26</sup> An annual attendance of PROMPT is encouraged for all staff and a two-yearly  
20 attendance is a mandatory requirement for staff working on the birth unit. It is used for  
21 credentialing the staff members with remediation plans for participants unable to meet the  
22 expected standards of performance for both technical and non-technical skills. Our goal will  
23 be to continue to strengthen this process and to formalise it further, linking it with  
24 professional development.  
25  
26  
27  
28  
29  
30  
31  
32  
33  
34

### 35 **Conclusions**

36  
37 The study highlights the need for teaching teamwork, communication and leadership skills in  
38 managing obstetric emergencies through a high fidelity simulation program. The impact on  
39 clinical outcomes seems limited, yet we identified some differences related to management of  
40 shoulder dystocia and postpartum haemorrhage that could have made a difference in certain  
41 individual cases. Improved participant confidence with up-skilling of both procedural and  
42 non-technical skills has a potential to change clinical practice and outcomes, hence, validating  
43 the incorporation of these IPE simulation strategies in clinical care.  
44  
45  
46  
47  
48  
49  
50  
51  
52  
53  
54  
55  
56  
57  
58  
59  
60

1  
2  
3 **Acknowledgements:** We would like to thank the birth unit staff across sites at Monash  
4  
5 Health.

6  
7  
8  
9 **Disclosure of interests:** The PROMPT program at Monash Health was supported by funding  
10  
11 of the Victorian Managed Insurance Authority (VMIA), the public hospital insurer when it  
12  
13 was introduced. VMIA had no role in study design, data collection and analysis, or  
14  
15 manuscript preparation. The authors ML,PN,DL, SalSto, JM are involved in the delivery of  
16  
17 PROMPT at their hospital but have no financial involvement.  
18  
19

20  
21  
22 **Contribution to authorship:** AK conceived and designed the study, analysed the data, wrote  
23  
24 the first draft of the manuscript and finalised the submission. SS performed the study,  
25  
26 analysed the data, edited the manuscript, and approved the final submission. DL, JM, PN, MS  
27  
28 and SS performed the study, and approved the final submission. EMW conceived and  
29  
30 designed the study, contributed to analysis tools, edited and finalised the submission. DN  
31  
32 analysed the data and contributed to analysis tools. PD is the senior author, conceived,  
33  
34 designed, performed and supervised the study, analysed data and approved the final  
35  
36 submission.  
37  
38  
39  
40

41 **Details of ethics approval:** The study was approved by Monash human research ethics  
42  
43 committee as a quality assurance project.  
44  
45  
46  
47

48 **Funding:** The PROMPT program at Monash Health was supported by funding of the  
49  
50 Victorian Managed Insurance Authority (VMIA), when it was introduced.  
51  
52  
53

54 **Data sharing:** There is no other unpublished data from this study  
55  
56  
57  
58  
59  
60

1  
2  
3 Access to the data is available only to the research team in a secure (coded) format

4  
5 Clinical data has been obtained from Birthing Outcome Software (BOS®) and is accessible to  
6  
7 only registered BOS® users in the healthcare network.  
8  
9  
10  
11  
12  
13  
14  
15  
16  
17  
18  
19  
20  
21  
22  
23  
24  
25  
26  
27  
28  
29  
30  
31  
32  
33  
34  
35  
36  
37  
38  
39  
40  
41  
42  
43  
44  
45  
46  
47  
48  
49  
50  
51  
52  
53  
54  
55  
56  
57  
58  
59  
60

For peer review only

## References

1. Leonard M, Graham S, Bonacum D. The human factor: The critical importance of effective teamwork and communication in providing safe care. *Qual Saf Health Care* 2004;**13**(SUPPL. 1):i85-i90.
2. Barr H, Koppel I, Reeves S, et al. *Effective Interprofessional Education: Argument, Assumption and Evidence*: Blackwell Publishing Ltd, 2005.
3. Wong AHW, Gang M, Szyld D, et al. Using a simulation-enhanced interprofessional education strategy to improve attitudes toward teamwork and communication. *Simul Healthc* 2016;**11**(2):117-25.
4. Crofts JF, Ellis D, Draycott TJ, et al. Change in knowledge of midwives and obstetricians following obstetric emergency training: A randomised controlled trial of local hospital, simulation centre and teamwork training. *BJOG Int J Obstet Gynaecol* 2007;**114**(12):1534-41.
5. Siassakos D, Fox R, Bristowe K, et al. What makes maternity teams effective and safe? Lessons from a series of research on teamwork, leadership and team training. *Acta Obstet Gynecol Scand* 2013;**92**(11):1239-43.
6. Siassakos D, Fox R, Crofts JF, et al. The management of a simulated emergency: Better teamwork, better performance. *Resuscitation* 2011;**82**(2):203-06.
7. Siassakos D, Marshall L, Draycott T. Improving collaboration in maternity with interprofessional learning. *J Midwifery Women's Health* 2011;**56**(2):183.
8. Fransen AF, van de Ven J, Schuit E, et al. Simulation-based team training for multi-professional obstetric care teams to improve patient outcome: a multicentre, cluster randomised controlled trial. *BJOG : an international journal of obstetrics and gynaecology* 2016.
9. Hammick M, Freeth D, Koppel I, et al. A best evidence systematic review of interprofessional education: BEME Guide no. 9. *Med Teach* 2007;**29**(8):735-51.
10. Freeth D, Hammick M, Koppel I, et al. *A critical review of evaluations of interprofessional education*. . London: Learning and Support Network, Centre for Health Sciences and Practice., 2002.
11. Shoushtarian M, Barnett M, McMahon F, et al. Impact of introducing Practical Obstetric Multi-Professional Training (PROMPT) into maternity units in Victoria, Australia. *BJOG Int J Obstet Gynaecol* 2014;**121**(13):1710-18.
12. Kumar A, Nestel D, Stoyles S, et al. Simulation based training in a publicly funded home birth programme in Australia: A qualitative study. *Women Birth* 2016;**29**(1):47-53.
13. Braun V, Clarke V. Using thematic analysis in psychology. *Qualitative Research in Psychology* 2006;**3**(2):77-101.
14. Bosse HM, Mohr J, Buss B, et al. The benefit of repetitive skills training and frequency of expert feedback in the early acquisition of procedural skills. *BMC Med Educ* 2015;**15**(1).
15. Lewin K. *Frontiers in Group Dynamics: Concept, Method and Reality in Social Science; Social Equilibria and Social Change*. Hum Relat 1947;**1**(1):5-41.
16. Cornthwaite K, Edwards S, Siassakos D. Reducing risk in maternity by optimising teamwork and leadership: An evidence-based approach to save mothers and babies. *Best Pract Res Clin Obstet Gynaecol* 2013;**27**(4):571-81.
17. Cooper S, Cant R, Connell C, et al. Measuring teamwork performance: Validity testing of the Team Emergency Assessment Measure (TEAM) with clinical resuscitation teams. *Resuscitation* 2016;**101**:97-101.
18. Bergh AM, Baloyi S, Pattinson RC. What is the impact of multi-professional emergency obstetric and neonatal care training? *Best Pract Res Clin Obstet Gynaecol* 2015;**29**(8):1028-43.
19. Ameh CA, Van Den Broek N. Making It Happen: Training health-care providers in emergency obstetric and newborn care. *Best Pract Res Clin Obstet Gynaecol* 2015;**29**(8):1077-91.
20. Weiner CP, Collins L, Bentley S, et al. Multi-professional training for obstetric emergencies in a US hospital over a 7-year interval: An observational study. *Journal of Perinatology* 2016;**36**(1):19-24.

- 1
- 2
- 3 21. Bajaj K, Rivera-Chiauszi EY, Lee C, et al. Validating Obstetric Emergency Checklists using
- 4 Simulation: A Randomized Controlled Trial. American Journal of Perinatology 2016.
- 5 22. Crofts JF, Winter C, Sowter MC. Practical simulation training for maternity care-where we are and
- 6 where next. BJOG Int J Obstet Gynaecol 2011;**118**(SUPPL. 3):11-16.
- 7 23. Gillan C, Lovrics E, Halpern E, et al. The evaluation of learner outcomes in interprofessional
- 8 continuing education: A literature review and an analysis of survey instruments. Med Teach
- 9 2011;**33**(9):e461-e70.
- 10 24. Calvert KL, McGurgan PM, Debenham EM, et al. Emergency obstetric simulation training: How do
- 11 we know where we are going, if we don't know where we have been? Aust New Zealand J
- 12 Obstet Gynaecol 2013;**53**(6):509-16.
- 13 25. Draycott T, Crofts J. Structured team training in obstetrics and its impact on outcome. Fetal
- 14 Matern Med Rev 2006;**17**(3):229-37.
- 15 26. Freeth D, Hammick M, Reeves S, et al. *Effective Interprofessional Education: Development,*
- 16 *Delivery and Evaluation*: Blackwell Publishing Ltd, 2008.
- 17
- 18
- 19
- 20
- 21
- 22
- 23
- 24
- 25
- 26
- 27
- 28
- 29
- 30
- 31
- 32
- 33
- 34
- 35
- 36
- 37
- 38
- 39
- 40
- 41
- 42
- 43
- 44
- 45
- 46
- 47
- 48
- 49
- 50
- 51
- 52
- 53
- 54
- 55
- 56
- 57
- 58
- 59
- 60

**Table 1: Modified Kirkpatrick's framework (adapted from Barr's six level classification)**

|          |                                   |                                                                             |
|----------|-----------------------------------|-----------------------------------------------------------------------------|
| Level 1  | Participant reaction              | Learners' views on the learning experience and its interprofessional nature |
| Level 2a | Change in attitudes               | Changes in attitudes towards team members of the interprofessional groups   |
| Level 2b | Change in knowledge or skills     | Including knowledge and skills related to the interprofessional activity    |
| Level 3  | Behavioural change                | Identify individual transfer of interprofessional learning                  |
| Level 4a | Change in organizational practice | Wider change in organisational practice and delivery of care                |
| Level 4b | Change in clinical outcome        | Improvement in change in patient care                                       |

\* Adapted with permission from Barr *et al*<sup>2</sup>



**Table 2: Learning acquired from the PROMPT program**

| Theme                                | Responses | Comments                                                                                                                                                                                                                                                                                                                                                                                                                                                                                                                                                                    |
|--------------------------------------|-----------|-----------------------------------------------------------------------------------------------------------------------------------------------------------------------------------------------------------------------------------------------------------------------------------------------------------------------------------------------------------------------------------------------------------------------------------------------------------------------------------------------------------------------------------------------------------------------------|
| Communication                        | 87        | <p><i>“Allocating task to a certain individual and not to someone!”</i></p> <p><i>“Use closed loop communication”</i></p> <p><i>“Use team members’ names”</i></p> <p><i>“Use specific terminology”</i></p> <p><i>“Effective communication between team members leads to effective management”</i></p> <p><i>“Communication becomes even more important in an emergency situation”</i></p> <p><i>“Asking who is in charge (of the situation)”</i></p> <p><i>“To ask what's happening for documentation, to tell when observations/anything is to be done”</i></p>            |
| Knowledge of equipment and procedure | 78        | <p><i>“I learnt where things are kept so they can be accessed immediately in an emergency”</i></p> <p><i>“Familiarity with the ward and procedures to initiate emergency responses”</i></p> <p><i>“Need to spend time learning to hook up the resuscitation cot to the gases in birth rooms”</i></p> <p><i>“Using the resuscitaire, turning it on”</i></p> <p><i>“Familiarise yourself with the content of the emergency boxes”</i></p> <p><i>“It was difficult to find the equipment like the IV pump for the simulation. I understand we need to know where these</i></p> |

|                                             |           |                                                                                                                                                                                                                                                                                                                                                                                                                                                                                                                                      |
|---------------------------------------------|-----------|--------------------------------------------------------------------------------------------------------------------------------------------------------------------------------------------------------------------------------------------------------------------------------------------------------------------------------------------------------------------------------------------------------------------------------------------------------------------------------------------------------------------------------------|
|                                             |           | <i>things are.”</i>                                                                                                                                                                                                                                                                                                                                                                                                                                                                                                                  |
| <b>Learning leadership and followership</b> | <b>73</b> | <p><i>“Put hand up if free when already completed a task in an emergency situation”</i></p> <p><i>“It’s ok to not have a job and wait”</i></p> <p><i>“Learned to identify the importance of clarifying leadership role in every scenario”</i></p> <p><i>“Step in with a helicopter leader role”</i></p> <p><i>“Ask who is the leader/what is going on/what can I do?”</i></p> <p><i>“I needed to be more assertive as team leader”</i></p> <p><i>“Clear instructions and explicitly determining who the emergency leader is”</i></p> |
| <b>Supportive learning environment</b>      | <b>68</b> | <p><i>“Useful to practise these things in team prior to the real deal”</i></p> <p><i>“It consolidated training/knowledge that I have come across in pieces”</i></p> <p><i>“It identifies my weaknesses so I can work on them”</i></p> <p><i>“Learning about eclampsia and PPH in a relaxed environment”</i></p>                                                                                                                                                                                                                      |
| <b>Realism in simulation</b>                | <b>48</b> | <p><i>“Having a serious actress helped to keep it real”</i></p> <p><i>“Stay calm in a stressful emergency”</i></p> <p><i>“Practical experience of emergencies we don’t normally get to manage”</i></p>                                                                                                                                                                                                                                                                                                                               |
| <b>Interprofessional roles and teamwork</b> | <b>46</b> | <p><i>“Teamwork improves working together”</i></p> <p><i>“My specific role as a RMO (junior doctor) in an emergency situation....”</i></p>                                                                                                                                                                                                                                                                                                                                                                                           |

|                       |           |                                                                                                                                                                                                                                                                                                                                                                         |
|-----------------------|-----------|-------------------------------------------------------------------------------------------------------------------------------------------------------------------------------------------------------------------------------------------------------------------------------------------------------------------------------------------------------------------------|
|                       |           | <p><i>"....taking on roles/tasks that I can do instead of RMO"</i></p> <p><i>"That you could have a small role that makes up effective care"</i></p>                                                                                                                                                                                                                    |
| <b>Prioritisation</b> | <b>33</b> | <p><i>"(checking) Fetal heart rate during eclamptic fit is not a priority"</i></p> <p><i>"Think of first line of management in a maternity emergency"</i></p> <p><i>"IV fluids very important in PPH, possibly more than drugs"</i></p> <p><i>"The importance of airway and fluid resuscitation"</i></p> <p><i>"The first steps in managing an eclamptic woman"</i></p> |

**Table 3:** Shoulder dystocia

|                                | 2011-2012     | 2014-2015     | <i>p-value</i> |
|--------------------------------|---------------|---------------|----------------|
| Cases                          | 268 (1.7%)    | 290 (2.3%)    | <b>0.001</b>   |
| Live born                      | 268 (100%)    | 290 (100%)    | 1.00           |
| Internal manoeuvres            | 51 (19%)      | 54 (19%)      | 0.91           |
| Interval between head and body | 2.0 (IQR 1-3) | 2.0 (IQR 1-2) | <b>0.04</b>    |
| Brachial plexus injury         | 17 (6%)       | 10 (3%)       | 0.12           |
| Fracture*                      | 14 (5%)       | 7 (2%)        | 0.12           |
| Apgar <7 @ 5min                | 21 (8%)       | 15 (5%)       | 0.31           |
| Lactate >8 mg/dL               | 12 (4%)       | 22 (8%)       | 0.16           |
| Admission SCN/NICU             | 87 (32%)      | 74 (26%)      | 0.08           |
| Major perineal trauma          | 31 (12%)      | 27 (9%)       | 0.41           |
| 3 <sup>rd</sup> degree tear    | 28 (10%)      | 26 (9%)       | 0.48           |
| 4 <sup>th</sup> degree tear    | 3 (1%)        | 1 (0.3%)      | 0.36           |
| Management sheet completed     | 63 (24%)      | 48 (17%)      | <b>0.04</b>    |

\* Humerus or clavicle

SCN: special care nursery; NICU: neonatal intensive care unit

**Table 4:** Postpartum haemorrhage 1000-1499 mL

|                                         | 2011-2012   | 2014-2015  | <i>p-value</i> |
|-----------------------------------------|-------------|------------|----------------|
| Cases                                   | 561 (3.7%)  | 511 (4.1%) | 0.09           |
| CS                                      | 196 (35%)   | 176 (34%)  | 0.90           |
| Transfer to theatre after vaginal birth | 65 (12%)    | 76 (15%)   | 0.12           |
| IV access before theatre                | 260 (99.6%) | 252 (100%) | 1.00           |
| Bakri balloon                           | 2 (0.4%)    | 6 (1%)     | 0.16           |
| ICU admission                           | 0           | 3 (0.6%)   | 0.12           |
| RBC transfusion                         | 65 (12%)    | 75 (15%)   | 0.15           |

CS: caesarean section; ICU: intensive care unit; RBC: red blood cells

**Table 5:** Postpartum haemorrhage >1500mL

|                                         | 2011-2012   | 2014-2015   | <i>p-value</i> |
|-----------------------------------------|-------------|-------------|----------------|
| Cases                                   | 329 (2.2%)  | 287 (2.3%)  | 0.48           |
| CS                                      | 101 (31%)   | 64 (22%)    | <b>0.03</b>    |
| Transfer to theatre after vaginal birth | 99 (30%)    | 108 (38%)   | <b>0.049</b>   |
| IV access before theatre                | 199 (99.5%) | 171 (99.4%) | 1.00           |
| Bakri balloon                           | 21 (6%)     | 34 (12%)    | <b>0.02</b>    |
| ICU admission                           | 23 (7%)     | 24 (8.3%)   | 0.55           |
| RBC transfusion                         | 156 (47%)   | 149 (52%)   | 0.29           |

CS: caesarean section; ICU: intensive care unit; RBC: red blood cells

### Figure Legend

**Figure 1:** Bar diagrams showing level of knowledge (Q1), confidence (Q2) or prior experience (Q3) of medical staff (top panel) and midwifery staff (bottom panel) in dealing with eclampsia, shoulder dystocia, neonatal resuscitation (NLS) and postpartum haemorrhage (PPH).

1-5 on the y- axis denotes likert scale rating, where 5 is the highest rating.

For peer review only

1  
2  
3  
4  
5  
6  
7  
8  
9  
10  
11  
12  
13  
14  
15  
16  
17  
18  
19  
20  
21  
22  
23  
24  
25  
26  
27  
28  
29  
30  
31  
32  
33  
34  
35  
36  
37  
38  
39  
40  
41  
42  
43  
44  
45  
46  
47  
48  
49  
50  
51  
52  
53  
54  
55  
56  
57  
58  
59  
60

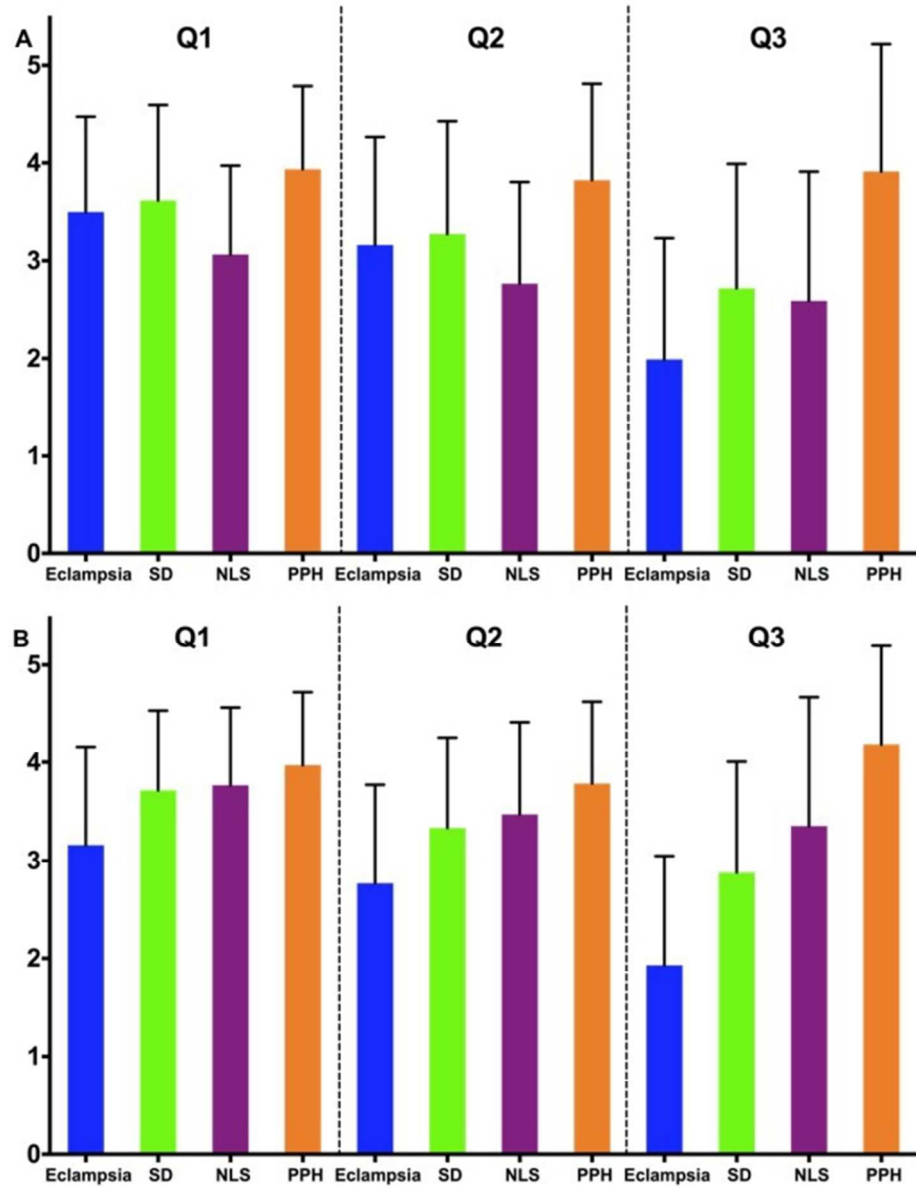

64x80mm (300 x 300 DPI)



STROBE Statement for PROMPT study  
(Research checklist)

|                    |                                                |                |
|--------------------|------------------------------------------------|----------------|
| Title and Abstract | Study design                                   | Page2          |
|                    | Summary of the study provided                  | Page 2 and 3   |
| Introduction       | Background                                     | Page 4 and 5   |
|                    | Objectives                                     | Page 5         |
| Methods            | Study design                                   | Page 5         |
|                    | Setting                                        | Page 5 and 6   |
|                    | Eligibility criteria                           | Page 6         |
|                    | Variables (outcome measures)                   | Page 6 and 7   |
|                    | Data sources/measurement                       | Page 7 and 8   |
|                    | Bias                                           | Page 6 and 7   |
|                    | Study size                                     | Page 5,6 and 7 |
|                    | Quantitative variables                         | Page 7 and 8   |
|                    | Statistical analysis                           | Page 7 and 8   |
|                    | Qualitative analysis                           | Page 6 and 7   |
| Results            | Descriptive data - demography                  | Page 8         |
|                    | Main results - Thematic (qualitative) analysis | Page 8-13      |
|                    | Main results - quantitative                    | Page 13 and 14 |
|                    | Other results                                  | Page 8         |
| Discussion         | Key results                                    | Page 14 - 16   |
|                    | Limitations                                    | Page 16 and 17 |
|                    | Interpretation                                 | Page 17 and 18 |
|                    | Generalisability                               | Page 17 and 18 |
|                    | Funding                                        | Page 19        |
|                    |                                                |                |

# BMJ Open

## Evaluation of learning from Practical Obstetrical Multi-Professional Training and its impact on patient outcomes in Australia using Kirkpatrick's method: A mixed methods study

|                                 |                                                                                                                                                                                                                                                                                                                                                                                                                                                                                                                                                                                                                                                                                                                                                |
|---------------------------------|------------------------------------------------------------------------------------------------------------------------------------------------------------------------------------------------------------------------------------------------------------------------------------------------------------------------------------------------------------------------------------------------------------------------------------------------------------------------------------------------------------------------------------------------------------------------------------------------------------------------------------------------------------------------------------------------------------------------------------------------|
| Journal:                        | <i>BMJ Open</i>                                                                                                                                                                                                                                                                                                                                                                                                                                                                                                                                                                                                                                                                                                                                |
| Manuscript ID                   | bmjopen-2017-017451.R2                                                                                                                                                                                                                                                                                                                                                                                                                                                                                                                                                                                                                                                                                                                         |
| Article Type:                   | Research                                                                                                                                                                                                                                                                                                                                                                                                                                                                                                                                                                                                                                                                                                                                       |
| Date Submitted by the Author:   | 23-Nov-2017                                                                                                                                                                                                                                                                                                                                                                                                                                                                                                                                                                                                                                                                                                                                    |
| Complete List of Authors:       | Kumar, Arunaz; Monash Health, Monash Women's Services; Monash University, Department of Obstetrics and Gynaecology<br>Sturrock, Sam; Monash Health, Monash Women's Services<br>Wallace, Euan; Monash University, Department of Obstetrics and Gynaecology<br>Nestel, Debra; Monash University, School of Rural Health<br>Lucey, Donna; Monash Health, Monash Women's Services<br>Stoyles, Sally; Monash Health, Monash Women's Services<br>Morgan, Jenny; Monash Health, Monash Women's Services<br>Neil, Peter; Monash Health, Monash Women's Services<br>Schipalius, Michelle; Monash Health, Monash Women's Services<br>Dekoninck, Philip; Monash Health, Monash Women's Services; The Ritchie Centre, Hudson Institute of Medical Research |
| <b>Primary Subject Heading</b>: | Medical education and training                                                                                                                                                                                                                                                                                                                                                                                                                                                                                                                                                                                                                                                                                                                 |
| Secondary Subject Heading:      | Obstetrics and gynaecology                                                                                                                                                                                                                                                                                                                                                                                                                                                                                                                                                                                                                                                                                                                     |
| Keywords:                       | simulation, interprofessional learning, interprofessional education, evaluation, patient outcome                                                                                                                                                                                                                                                                                                                                                                                                                                                                                                                                                                                                                                               |
|                                 |                                                                                                                                                                                                                                                                                                                                                                                                                                                                                                                                                                                                                                                                                                                                                |

SCHOLARONE™  
Manuscripts

1  
2  
3 **Evaluation of learning from Practical Obstetrical Multi-Professional Training and its**  
4 **impact on patient outcomes in Australia using Kirkpatrick's framework: A mixed**  
5 **methods study**  
6  
7  
8  
9

10  
11 Arunaz Kumar<sup>1,2</sup>, Sam Sturrock<sup>1</sup>, Euan M Wallace<sup>2</sup>, Debra Nestel<sup>3</sup>, Donna Lucey<sup>1</sup>, Sally  
12 Stoyles<sup>1</sup>, Jenny Morgan<sup>1</sup>, Peter Neil<sup>1</sup>, Michelle Schlipalius<sup>1</sup>, Philip DeKoninck<sup>1,4</sup>  
13  
14  
15

16  
17  
18 <sup>1</sup>Monash Women's Service, Monash Health, Melbourne, Australia

19  
20 <sup>2</sup>Department of Obstetrics and Gynaecology, Monash University, Melbourne, Australia

21  
22 <sup>3</sup>School of Rural Health, Monash University, Melbourne, Australia

23  
24 <sup>4</sup>The Ritchie Centre, Hudson Institute of Medical Research, Melbourne, Australia  
25  
26  
27

28  
29 Running title: Evaluation of PROMPT learning and clinical outcomes  
30  
31

32  
33 Corresponding author:  
34

35 Dr Arunaz Kumar  
36

37 Department of Obstetrics and Gynaecology,  
38

39 O and G Education office Level 5, Monash University,  
40

41 Monash Medical Centre, 246 Clayton Road,  
42

43 Clayton, Vic 3168, Australia  
44

45 Tel: +61395945174  
46  
47

48 Email: arunaz.kumar@monash.edu  
49  
50  
51  
52  
53  
54  
55  
56  
57  
58  
59  
60

## Abstract

**Objectives:** The aim of this study was to evaluate the implementation of the Practical Obstetric Multi-Professional Training (PROMPT) simulation using the Kirkpatrick's framework. We explored participants' acquisition of knowledge and skills, its impact on clinical outcomes and organisational change to integrate the PROMPT program as a credentialing tool. We also aimed to assess participants' perception of usefulness of PROMPT in their clinical practice.

**Study design:** Mixed methods approach with a pre-test / post-test design.

**Setting:** Healthcare network providing obstetric care in Victoria, Australia.

**Participants:** Medical and midwifery staff attending PROMPT between 2013 and 2015 (n=508); clinical outcomes were evaluated in two cohorts 2011-2012 (n=15,361 births) and 2014-2015 (n=12,388 births)

**Intervention:** Attendance of the PROMPT program, a simulation program taught in multidisciplinary teams to facilitate teaching emergency obstetric skills.

**Main outcome measure:** Clinical outcomes compared before and after embedding PROMPT in educational practice.

**Secondary outcome measure:** Assessment of knowledge gained by participants through a qualitative analysis and description of process of embedding PROMPT in educational practice.

**Results:** There was a change in the management of postpartum haemorrhage by early recognition and intervention. The key learning themes described by participants were being prepared with a prior understanding of procedures and equipment, communication, leadership, and learning in a safe, supportive environment. Participants reported a positive learning experience and increase in confidence in managing emergency obstetric situations, through the PROMPT program which was perceived as a realistic demonstration of the emergencies.

1  
2  
3 **Conclusion:** Participants reported an improvement of both clinical and non-technical skills  
4 highlighting principles of teamwork, communication, leadership and prioritisation in an  
5 emergency situation. An improvement was observed in management of postpartum  
6 haemorrhage but no significant change was noted in clinical outcomes over a two-year period  
7 after PROMPT. However, the skills acquired by medical and midwifery staff justify  
8 embedding PROMPT in educational programs.  
9  
10  
11  
12  
13  
14  
15  
16  
17

### 18 **Strengths and limitations of the study**

- 19
- 20 • This is one of the few mixed methods studies on evaluation of training programs using  
21 multiple levels of Kirkpatrick's assessment capturing participant reaction, knowledge  
22 acquisition, organisational change and patient outcome.  
23  
24
- 25 • This is an outcome-based evaluation using the high levels of the Kirkpatrick's framework  
26 (evaluating impact on the health service and patient outcome) providing evidence of  
27 training effectiveness.  
28  
29
- 30 • The participants' behaviour (under direct observation or by using videos) could not be  
31 studied in either simulation or a clinical setting.  
32  
33  
34  
35  
36  
37  
38  
39  
40  
41  
42  
43  
44  
45  
46  
47  
48  
49  
50  
51  
52  
53  
54  
55  
56  
57  
58  
59  
60

## Introduction

Interprofessional team-based, simulated training programs are becoming increasingly popular to improve the performance of clinical workforce in emergency responses, and its resultant clinical outcomes. The provision of high quality birth suite care is no exception. Staff training in technical clinical skills is put to test in complex obstetric situations that require time critical management. Team members must be instantly engaged to achieve synergism in managing acute obstetric emergencies. Hence, acquisition of non-technical skills (NTS), such as effective communication and teamwork, are as important as mastering “hands-on” clinical skills.<sup>1</sup>

Interprofessional education (IPE) focuses on “staff members working together to learn *with, from and about* each other”.<sup>2</sup> IPE programs help individuals to develop an understanding of other professional roles within the multidisciplinary team. Such an understanding is thought important for safe and effective clinical practice as a team.<sup>3</sup> In order to maintain a level of confidence in managing these difficult clinical emergencies regular up-skilling sessions are necessary.

PROMPT (PRactical Obstetric Multi-Professional Training) is a multi-professional training package designed to expose participants (obstetricians, midwives, paediatricians and anaesthetists) to obstetric emergencies in a real time environment.<sup>4-8</sup> This simulation-based program aims to recreate clinical problems either “in-situ” in a birth unit or in a simulation centre and presents them to participants as realistically as possible. The scenarios can be designed specifically for the level of the participants and the available facilities. Evaluation of these programs is necessary to assess if their objectives are met. Programs can be evaluated using various frameworks, one of them being the six level modification of Kirkpatrick’s

1  
2  
3 framework.<sup>2 9 10</sup> The various levels assess participant's satisfaction, change in attitude or  
4 identification of what was learnt, if these skills changed participant behaviour in a clinical  
5 setting or ultimately affected clinical organisational change and patient outcomes (see Table  
6  
7  
8  
9 1).

10  
11  
12  
13 We introduced the Victorian state version of the PROMPT program to our maternity service  
14 in 2013.<sup>11</sup> In this study, we aimed to evaluate the impact of PROMPT in our health service by  
15 assessing the various levels in the six-level framework. Specifically, we wished to identify the  
16 "key learning points" acquired, "how" useful this workshop style teaching was rated and  
17 whether there was any evidence of change in patient outcomes. We also describe the process  
18 of "embedding" this program in educational up-skilling of staff.  
19  
20  
21  
22  
23  
24  
25  
26  
27

## 28 **Methods**

### 29 **Study design**

30  
31 The study follows a mixed methods design with quantitative analysis of patient outcome data  
32 and for participant rating of the intervention. The data regarding the key learning messages  
33 was extracted using qualitative content analysis identifying key themes. The study was  
34 approved as a quality assurance project by the institutional research ethics committee.  
35  
36  
37  
38  
39  
40  
41  
42  
43

### 44 **Setting and participants**

45  
46 Monash Health maternity service provides birthing care for over 9000 women annually at  
47 three separate hospital sites, each with different levels of acuity, all within metropolitan  
48 Melbourne, Victoria. The three sites share common clinical practice guidelines, policies and  
49 procedures. Monash Health implemented the PROMPT program in its current format across  
50 all its sites since 2013. Midwifery educators and dedicated senior obstetric medical staff run  
51  
52  
53  
54  
55  
56  
57  
58  
59  
60

1  
2  
3 the program. The PROMPT sessions are conducted ten times per year at each site at monthly  
4 intervals. Midwifery and medical staff (junior and senior) are required to participate at least  
5 every two years. All medical and midwifery staff who had attended the PROMPT session at  
6 least once between 2013 and 2015 were invited to participate in the study.  
7  
8  
9

### 10 11 12 13 *PROMPT program scenarios*

14  
15 The half-day program consists of short, interactive lectures and scenario-based drills. Each  
16 drill is followed by a debrief covering clinical and non-technical skills. The clinical scenarios  
17 include eclampsia, shoulder dystocia, neonatal resuscitation and postpartum haemorrhage  
18 (PPH). These are topics that were already covered in the pre-reading material provided to the  
19 participants.  
20  
21  
22  
23  
24  
25  
26  
27

### 28 29 *Questionnaires*

30  
31 The evaluation of the PROMPT workshop followed a pre-test and a post-test research design  
32 using paper-based questionnaires. The questionnaires were drafted, revised and agreed upon  
33 by the PROMPT committee (represented by both medical and midwifery educators) to  
34 establish content validity. The questionnaires had been pilot tested in a home birth based  
35 simulation program (in a different participant group that included home birth midwives) at  
36 Monash Health and results published in a peer reviewed journal.<sup>12</sup> Each questionnaire had 26  
37 items where participants' responses are recorded using a 5-point Likert scale. The pre-test  
38 evaluated levels of knowledge and confidence managing the obstetric emergencies covered.  
39 They are also asked about participants' professional background and experience in these  
40 clinical emergencies. At the end of the workshop the post-test evaluated the satisfaction and  
41 learning acquired from the program. Participants were also asked to reflect on the essential  
42  
43  
44  
45  
46  
47  
48  
49  
50  
51  
52  
53  
54  
55  
56  
57  
58  
59  
60



1  
2  
3 learning points attained that were thought to be transferable to their (individual or team-based)  
4  
5 clinical practice using free text.  
6  
7

8  
9 Textual data were analysed independently and inductively using content analysis undertaken  
10  
11 by two researchers independently (AK, SS) to produce key themes.<sup>13</sup> The results were  
12  
13 discussed and after establishing consensus, all data were recoded. Some categories overlapped  
14  
15 but items were counted only once. Discrepancies were negotiated enabling final attribution of  
16  
17 text within categories.  
18  
19

### 20 21 22 *Clinical outcome measures* 23

24 A retrospective cohort study examined all documented cases of the three major obstetric  
25  
26 emergencies covered during the drills (eclampsia, shoulder dystocia combined with neonatal  
27  
28 resuscitation, and post-partum haemorrhage). Clinical outcomes were evaluated in two  
29  
30 cohorts: before the implementation of PROMPT in 2011-2012 (n=15,361 births) and after the  
31  
32 implementation of PROMPT in 2014-2015 (n=12,388 births). Patient outcomes were  
33  
34 evaluated using the following measures. For shoulder dystocia we measured the use of  
35  
36 external and internal manoeuvres, time between delivery of the head and the body, completion  
37  
38 of documentation, major maternal perineal trauma (3<sup>rd</sup> and 4<sup>th</sup> degree tears), and neonatal  
39  
40 outcomes including brachial plexus injury, clavicle or humerus fracture, Apgar score <7 at 5  
41  
42 minutes, umbilical cord lactates >8 mg/dl, admission to newborn services and perinatal death.  
43  
44 For PPH, we classified women into two groups according to the estimated volume of blood  
45  
46 loss (1000ml-1499ml or >=1500ml) reporting rates of blood transfusion, transfer to the  
47  
48 operating theatre, intravenous fluid resuscitation and use of a (Bakri®) balloon tamponade.  
49  
50  
51  
52  
53  
54  
55  
56  
57  
58  
59  
60

1  
2  
3 Data were extracted from an electronic database of birthing outcomes, the Birthing Outcomes  
4 System (BOS®), that records outcomes for all births  $\geq 20$  weeks of gestation and is routinely  
5 entered by midwifery staff.<sup>14</sup> Where necessary BOS data was supplemented by individual  
6 case record review.  
7  
8  
9

### 10 11 12 13 *Statistical analysis*

14  
15 Data were analysed with Prism for Mac version 7.0a (Graph pad software, San Diego, CA,  
16 USA). Continuous data were expressed as medians and interquartile range (IQR) because of  
17 skewed distributions. To compare the two cohorts, we used a Mann-Whitney *U* test for  
18 quantitative data and a Fisher's exact test for contingency testing. A *p*-value  $< 0.05$  was  
19 considered statistically significant.  
20  
21  
22  
23  
24  
25  
26  
27

## 28 29 **Results**

### 30 31 *Participation*

32  
33 Since 2013 we have run 70 PROMPT sessions across our three sites with a total of 508  
34 participants. Approximately one-third (n=178, 35%) of participants were medical staff (junior  
35 and senior). The remaining were midwifery staff (n=287, 56%), medical or midwifery  
36 students (n=34, 7%) or special care nursery staff (n=9, 2%). By 2015, 76% midwives and  
37 90% senior medical staff had participated at least once in PROMPT.  
38  
39  
40  
41  
42  
43  
44  
45

### 46 47 *Satisfaction with the simulation activity (Level 1 Kirkpatrick's framework)*

48  
49 Figure 1 summarises the participant knowledge, confidence and prior experience in managing  
50 obstetric emergencies. Staff confidence in management of eclampsia was lower than that for  
51 the other obstetric emergencies. The confidence and knowledge concerning neonatal  
52 resuscitation was higher for midwives than the medical staff (Figure 1). In general, the  
53  
54  
55  
56  
57  
58  
59  
60

workshops were rated highly by both medical and midwifery participants (median Likert score of 5 (maximum) for both groups) in regards to clinical usefulness of material covered and debriefing experience.

### ***Knowledge acquired from the workshop (Level 2b Kirkpatrick's framework)***

430 comments made by 237 participants were available for content analysis (Table 2). The key themes related to improved communication between staff members (n=87), developing knowledge of equipment and procedures (78 responses), learning leadership and followership (73 responses), being in a supportive learning environment (63 responses), the realism of the simulation (48 responses), understanding the roles of staff from another profession (46 responses) and prioritisation of tasks (33 responses).

### ***Communication***

Clear communication established directly with the members of the team (by using the individual's name) and with others who assist in the process e.g. with switchboard calling an emergency code. Where appropriate, specific terminology should be used. The loop of communication should be closed by obtaining a response from the recipient, to ensure accountability of the individual undertaking the task. The communication was seen to be even more crucial at certain times like the handover of a task to another member of the team.

### ***Situational awareness***

Identification and knowledge of equipment, its location in the birth unit, organisation of the equipment and knowing if it was in working order was recognised as relevant for the staff using it in an emergency with time constraints. A prior familiarity of content and a practice of using the postpartum and eclampsia kit, was found to be essential. Necessary gear found

1  
2  
3 missing at the time of workshop or kept in the wrong location, delayed the management and  
4  
5 caused stress to the team.  
6  
7

8  
9 Similarly staff members were keen to have a prior awareness of protocols and procedures,  
10  
11 more so in complex situations like eclampsia and neonatal resuscitation and where clinical  
12  
13 manoeuvres were needed like shoulder dystocia. The organisational pathways needed like  
14  
15 calling an emergency code and methods to access operating theatres in an emergency were  
16  
17 also emphasised.  
18  
19

### 20 21 22 *Learning leadership and followership* 23

24 The importance of leading an emergency team presented as an unexpectedly prominent theme.  
25  
26 The key characteristics of a leader were to maintain a “helicopter view” at all times and be  
27  
28 clear and assertive with instructions to participants. Establishing and announcing who the  
29  
30 leader of the team was (either by the leader or another participant) and appointing one if  
31  
32 already not designated. The leader could change during the emergency scenario depending on  
33  
34 individual capability and who was available. Handover from one leader to another needed  
35  
36 clear communication. In such situations, the new leader should initially “step back” and  
37  
38 assimilate the situation prior to taking over.  
39  
40  
41  
42

43  
44 The rest of the team should patiently wait for instructions, offer to help (based on their  
45  
46 individual scope of practice) and contribute to the team management by playing their  
47  
48 designated role. If the instructions were unclear or participants were unable to perform the  
49  
50 allocated task, they should speak up and close the communication loop.  
51  
52

### 53 54 55 *Supportive learning environment* 56 57

1  
2  
3 The PROMPT workshop was acknowledged to improve participants' confidence and learning  
4 of clinical knowledge and skills through individual opportunity to practice and team feedback.  
5  
6 In a simulated setting, the technical skills and procedures could be "unpacked" into small  
7 steps during the feedback session. The combination of learning emergency skills in a  
8 simulated environment was seen as a step towards improving women safety.  
9  
10  
11  
12

### 13 14 15 *Realism in simulation*

16  
17 The participants perceived the workshop to be similar to a real emergency through the role of  
18 an actor, scenario design, experiencing stress, working within timelines and location in a birth  
19 unit. The scenarios were based on rare emergencies and followed an unpredictable course  
20 resulting in participants feeling anxious and voiced the need to "stay calm".  
21  
22  
23  
24  
25  
26  
27

### 28 29 *Role of interprofessional staff*

30  
31 Participants displayed a preference to revert to their natural/ usual clinical roles when  
32 managing a clinical emergency as this was based on their strengths and scope of practice. The  
33 participants wanted to have a clear well defined role allocation which was "task specific".  
34  
35 Both medical and midwifery staff members were keen to share learning in the  
36 interprofessional setting and wanted to understand roles of the other discipline in the team.  
37  
38 Both teams referred to learning teamwork and task sharing.  
39  
40  
41  
42  
43  
44  
45

### 46 47 *Prioritisation*

48  
49 Participants demonstrated a need to organize the tasks systematically and to get help early.  
50  
51 They emphasized on timely escalation of tasks due to their awareness of their limitations in  
52 managing emergency situations and their scope of practice.  
53  
54  
55  
56  
57  
58  
59  
60

1  
2  
3 ***Organisational change to “embed” the PROMPT program (Level 4a Kirkpatrick’s***  
4 ***framework)***  
5

6  
7 We describe the process of embedding the PROMPT program using Kurt Lewin’s 3-phase  
8  
9 model.<sup>15</sup>  
10

11  
12  
13 *Step 1 - Unfreeze*  
14

15  
16 The key issue of poor communication (occasionally leading to conflict) among medical and  
17  
18 midwifery staff was recognised through incident reporting as a component of a risk  
19  
20 management process. This was seen to delay mobilising resources required in an emergency  
21  
22 setting, hence compromising optimum patient safety. In a time critical situation, where  
23  
24 effective teamwork is the key, a need to create change was recognised by medical and  
25  
26 midwifery leaders at the institution. The need to change was communicated both to the health  
27  
28 care network executive group and to the clinical staff delivering patient care. This coincided  
29  
30 with introduction of the PROMPT program in the state of Victoria resulting in strategic  
31  
32 inclusion of the team-training program for medical and midwifery staff.  
33  
34  
35  
36

37 *Step 2 - Change*  
38

39  
40 The change described here is embedding the PROMPT program as a component of routine  
41  
42 educational practice. The principles learnt through the program focussed on communication,  
43  
44 leadership and situational awareness, similar to the vision shared by the institution. The  
45  
46 benefits of attending the program were communicated to the staff and feedback encouraged  
47  
48 from participants. Problems that hindered attendance (like rostering issues, managing patient  
49  
50 workload on teaching days) were dealt with promptly. Funding was obtained from the  
51  
52 institution by reporting benefits of change in attitude of interprofessional staff and observed  
53  
54 improvement in performance, although this was not formally evaluated. This funding further  
55  
56  
57  
58  
59  
60

1  
2  
3 facilitated the operational management of the program, as dedicated clinical staff members  
4  
5 could be employed to sustain the quality of teaching.  
6  
7

### 8 9 *Step 3 - Refreeze*

10  
11 The observed improvement in attitudes of the interprofessional staff and effort to meet higher  
12  
13 standards of clinical practice was encouraged. Leadership and operational support required to  
14  
15 run the program was improved (by increasing the numbers of faculty members facilitating the  
16  
17 program) and on-going training support provided to them. A process of providing team-based  
18  
19 feedback was developed (using the PROMPT guidelines) and the role of learning through  
20  
21 PROMPT was formalised which lent itself to its use as credentialing tool. A mandatory  
22  
23 requirement of two-yearly attendance was set up for all medical and midwifery staff.  
24  
25  
26  
27

### 28 29 ***Clinical Outcomes (Level 4b Kirkpatrick's framework)***

30  
31 In 2011-2012 there were 15,361 births and in 2014-2015, 12,388 births at Monash Health.  
32  
33  
34

### 35 36 *Eclampsia*

37  
38 Across the four years, four women had an eclamptic seizure, two in 2011-2012 (0.13/1000)  
39  
40 and two in 2014-2015 (0.16/1000). All four women were managed as per local protocol.  
41  
42  
43

### 44 45 *Shoulder Dystocia (Table 3)*

46  
47 Table 3 summarises the incidence and outcomes related to shoulder dystocia. The rate of  
48  
49 shoulder dystocia in 2011-12 (n=268; 1.7%) was significantly lower than in 2014-15 (n=290;  
50  
51 2.3%,  $p=0.001$ ) No neonatal deaths were recorded in either group. The interval between  
52  
53 delivery of head and body was shorter in the recent cohort (2.0 min (IQR 1-2) vs 2.0 min  
54  
55 (IQR 1-3),  $p = 0.04$ ). In the cohort after implementation of PROMPT we observed lower  
56  
57  
58  
59  
60

1  
2 incidences of brachial plexus injury, humerus or clavicle fractures, low Apgar scores and  
3 nursery admissions, although these differences were not statistically significant (Table 3).  
4  
5 There was a significant decrease in the completion of the required shoulder dystocia  
6 emergency 'management sheet' (24% vs 17%;  $p = 0.04$ ).  
7  
8  
9  
10

#### 11 12 13 *Post Partum Haemorrhage (Table 4 and 5)*

14  
15 For women with a PPH of 1000-1499ml, there was no significant change in the number of  
16 cases between cohorts [n=561 (3.7%) vs n=511 (4.1%)], and no significant differences were  
17 observed in maternal outcomes or management strategies. For women with a PPH of  
18 >1500ml, a significant difference was seen in the number of patients transferred to theatre  
19 after vaginal birth (30% vs 38%;  $p = 0.049$ ), and the use of Bakri balloons (6% vs 12%;  $p =$   
20 0.02) which were introduced in 2011.  
21  
22  
23  
24  
25  
26  
27  
28  
29  
30

## 31 **Discussion**

### 32 *Main findings*

33  
34 Through a formal evaluation of PROMPT and a review of clinical outcomes we have  
35 observed that this multidisciplinary training has a positive effect on managing of obstetric  
36 emergencies within our service. Consistent with mandatory workforce training requirements,  
37 participation of both medical and midwifery staff was excellent across all of our sites such  
38 that PROMPT has become an embedded component of ongoing professional development. In  
39 this paper we have evaluated our PROMPT program using the various levels of Kirkpatrick's  
40 framework, observing encouraging results. All levels examined showed positive effects after  
41 implementation of this structured training. In addition, the evaluation allowed us to identify  
42 areas for future improvement such as record keeping of therapeutic measures.  
43  
44  
45  
46  
47  
48  
49  
50  
51  
52  
53  
54  
55  
56  
57  
58  
59  
60



1  
2  
3 Participants found PROMPT an effective approach for the acquisition of new skills and  
4  
5 knowledge. Medical and midwifery staff members reported an increase in confidence and had  
6  
7 high satisfaction scores on learning as a team (Level 1 Kirkpatrick's framework).  
8

9  
10 Our next level of assessment focussed on key "take-home" learnings acquired by the  
11  
12 participants (Level 2 Kirkpatrick's framework). Communication and situational awareness  
13  
14 were considered important NTS learnings by the majority of participants and is a finding  
15  
16 consistent with other studies.<sup>5 6</sup> The theme on "leadership" and "following the leader" are  
17  
18 thought critical for safe team-based management, both in simulated and real emergencies.<sup>6 16</sup>  
19  
20 Poor performance in leadership despite good communication can also occur, hence, making  
21  
22 leadership an independent learning goal of the workshop.<sup>17</sup> Developing improved "situational  
23  
24 awareness" with knowledge of equipment use and efficient use of team members is an often -  
25  
26 reported learning outcome of the PROMPT program.<sup>5</sup>  
27  
28  
29  
30

31  
32 Our final analysis reviewed the birthing outcome and safety data (Kirkpatrick's level 4b). In  
33  
34 the recent cohort we observed a significantly increased incidence of shoulder dystocia. This  
35  
36 could be related to an increased awareness of this condition but could also reflect the  
37  
38 increasing numbers of obese pregnant women delivering at our centres. We observed a small  
39  
40 but statistically significant difference in the interval between the delivery of head and body,  
41  
42 the clinical relevance of which is debatable. These could be assessed individually using case  
43  
44 reviews and learning gaps addressed through clinical case review meetings. The significant  
45  
46 increase in the number of patients transferred to theatre for control of massive post-partum  
47  
48 bleeding (PPH >1500mls), and the increase in the use of (Bakri) balloon tamponade may  
49  
50 reflect a greater awareness of the benefits of early and aggressive control of excessive  
51  
52 bleeding following our PROMPT implementation. This was also noted in a recent randomised  
53  
54  
55  
56  
57  
58  
59  
60

1  
2  
3 control trial where the units that participated in simulation based team training had a higher  
4  
5 incidence of blood transfusion and surgical treatment of PPH.<sup>8</sup>  
6  
7

### 8 9 *Strengths and limitations*

10  
11 The current study is one of few mixed methods studies attempting to draw a link between  
12  
13 perceived learning, clinical practice and outcomes by using various levels of Kirkpatrick's  
14  
15 framework. As far as we are aware only a few studies have evaluated simulation-based  
16  
17 intervention through multiple "lenses" of assessment, as reported in a recent review on  
18  
19 obstetric emergencies.<sup>18</sup> Most researchers have limited evaluations to either level 1 or 2 with  
20  
21 some studies demonstrating a change in team behaviour and retention of skills.<sup>19</sup> Studies  
22  
23 looking at clinical outcome are scant.<sup>8 11 18 20</sup> Our evaluation includes participant satisfaction  
24  
25 with the scenario and debrief (level 1) but also learning skills and knowledge acquired by the  
26  
27 two major interprofessional groups (level 2). We demonstrate the process from introduction of  
28  
29 the intervention and its "embedding" in curricular training and "credentialing" (level 4a). The  
30  
31 PROMPT program has been successfully integrated with teaching programs globally,  
32  
33 however, the description of the program with change management principles is worthy of  
34  
35 sharing. Above all, we have also compared the birthing outcome before and after the  
36  
37 intervention was introduced into practice (Level 4b).  
38  
39  
40  
41  
42  
43

44 However, due to challenges related to study design that entails direct observation of  
45  
46 participants in a "natural" setting, we were unable to assess a change in observed clinical  
47  
48 behaviour/teamwork that may have helped to directly connect workshop learning with clinical  
49  
50 practice, which may be done using clinical checklists.<sup>21</sup>  
51  
52  
53  
54  
55  
56  
57  
58  
59  
60

1  
2  
3 Patient care and clinical outcomes are rarely reported as evidence of effectiveness of  
4 educational programs.<sup>22</sup> Most likely this is because programs need to be embedded prior to  
5 evaluation and coverage of a sufficient proportion of the workforce needs to be achieved  
6 before improved care and outcomes would be expected. This can take many years.<sup>23-25</sup> An  
7 evaluation of the PROMPT program elsewhere, demonstrated a significant decrease in  
8 brachial plexus injury, incidence of pH less than 7, and a reduction of hypoxic ischemic  
9 encephalopathy by 50% when assessed over a 7-year interval.<sup>20</sup> We were unable to explore  
10 detailed outcome data prior to 2010 as previously documented notes had missing clinically  
11 relevant details, hence precluding us from assessing five years before and after PROMPT  
12 which may have provided a better reflection of birthing outcomes. However, this may not  
13 have changed the result as a similar study failed to show a significant reduction in the  
14 composite obstetric outcome in units where multi-professional simulation training was  
15 introduced.<sup>8</sup>

16  
17  
18  
19  
20  
21  
22  
23  
24  
25  
26  
27  
28  
29  
30  
31  
32  
33 A major strength of this evaluation is that it allowed insights into service delivery and  
34 identification of potential deficiencies. For instance, we observed a reduction in the  
35 completion of shoulder dystocia management forms. In addition our current record form lack  
36 certain outcome measures that would be of interest to evaluate clinical management, such as  
37 fluid volume usage during PPH.  
38  
39  
40  
41  
42  
43  
44  
45

#### 46 *Interpretation*

47  
48 Participants indicated that communication, situational awareness and leadership skills are key  
49 factors for managing emergencies as a successful team. The next level of evaluation planned  
50 will be to check the team performance in a real obstetric emergency setting to determine if the  
51 transfer of learning has occurred. This can be achieved by integration of level 3-assessment  
52  
53  
54  
55  
56  
57  
58  
59  
60

1  
2  
3 (behaviour) into our training development strategy by direct observation of performance in a  
4 simulated and/or clinical setting. Apart from more proactive management noted in postpartum  
5 haemorrhage, no significant difference was noted in clinical outcome. This may be due to  
6 existence of previously run simulation programs, which focussed on individual skills but not  
7 on effective teamwork. Although, participants recognise the importance of teamwork and  
8 communication in their learning, this was not transferable to a change in clinical outcome.  
9  
10  
11  
12  
13  
14  
15

16  
17  
18 This evaluation has already resulted in changing the organisational practice at our institution  
19 (Level 4a).<sup>26</sup> An annual attendance of PROMPT is encouraged for all staff and a two-yearly  
20 attendance is a mandatory requirement for staff working on the birth unit. It is used for  
21 credentialing the staff members with remediation plans for participants unable to meet the  
22 expected standards of performance for both technical and non-technical skills. Our goal will  
23 be to continue to strengthen this process and to formalise it further, linking it with  
24 professional development.  
25  
26  
27  
28  
29  
30  
31  
32  
33  
34

### 35 **Conclusions**

36  
37 The study highlights the need for teaching teamwork, communication and leadership skills in  
38 managing obstetric emergencies through a high fidelity simulation program. The impact on  
39 clinical outcomes seems limited, yet we identified some differences related to management of  
40 shoulder dystocia and postpartum haemorrhage that could have made a difference in certain  
41 individual cases. Improved participant confidence with up-skilling of both procedural and  
42 non-technical skills has a potential to change clinical practice and outcomes, hence, validating  
43 the incorporation of these IPE simulation strategies in clinical care.  
44  
45  
46  
47  
48  
49  
50  
51  
52  
53  
54  
55  
56  
57  
58  
59  
60

1  
2  
3 **Acknowledgements:** We would like to thank the birth unit staff across sites at Monash  
4  
5 Health.

6  
7  
8  
9 **Competing interests:** The PROMPT program at Monash Health was supported by funding of  
10  
11 the Victorian Managed Insurance Authority (VMIA), the public hospital insurer when it was  
12  
13 introduced. VMIA had no role in study design, data collection and analysis, or manuscript  
14  
15 preparation. The authors MS,PN,DL, SalSto, JM are involved in the delivery of PROMPT at  
16  
17 their hospital but have no financial involvement.

18  
19  
20  
21  
22 **Contribution to authorship:** AK conceived and designed the study, analysed the data, wrote  
23  
24 the first draft of the manuscript and finalised the submission. SS performed the study,  
25  
26 analysed the data, edited the manuscript, and approved the final submission. DL, JM, PN, MS  
27  
28 and SS performed the study, and approved the final submission. EMW conceived and  
29  
30 designed the study, contributed to analysis tools, edited and finalised the submission. DN  
31  
32 analysed the data and contributed to analysis tools. PD is the senior author, conceived,  
33  
34 designed, performed and supervised the study, analysed data and approved the final  
35  
36 submission.

37  
38  
39  
40  
41 **Details of ethics approval:** The study was approved by Monash human research ethics  
42  
43 committee as a quality assurance project.

44  
45  
46  
47  
48 **Funding:** The PROMPT program at Monash Health was supported by funding of the  
49  
50 Victorian Managed Insurance Authority (VMIA), when it was introduced.

51  
52  
53  
54 **Data sharing:** There is no other unpublished data from this study

1  
2  
3 Access to the data is available only to the research team in a secure (coded) format

4  
5 Clinical data has been obtained from Birthing Outcome Software (BOS®) and is accessible to  
6  
7 only registered BOS® users in the healthcare network.  
8  
9  
10  
11  
12  
13  
14  
15  
16  
17  
18  
19  
20  
21  
22  
23  
24  
25  
26  
27  
28  
29  
30  
31  
32  
33  
34  
35  
36  
37  
38  
39  
40  
41  
42  
43  
44  
45  
46  
47  
48  
49  
50  
51  
52  
53  
54  
55  
56  
57  
58  
59  
60

## References

1. Leonard M, Graham S, Bonacum D. The human factor: The critical importance of effective teamwork and communication in providing safe care. *Qual Saf Health Care* 2004;**13**(SUPPL. 1):i85-i90.
2. Barr H, Koppel I, Reeves S, et al. *Effective Interprofessional Education: Argument, Assumption and Evidence*: Blackwell Publishing Ltd, 2005.
3. Wong AHW, Gang M, Szyld D, et al. Using a simulation-enhanced interprofessional education strategy to improve attitudes toward teamwork and communication. *Simul Healthc* 2016;**11**(2):117-25.
4. Crofts JF, Ellis D, Draycott TJ, et al. Change in knowledge of midwives and obstetricians following obstetric emergency training: A randomised controlled trial of local hospital, simulation centre and teamwork training. *BJOG Int J Obstet Gynaecol* 2007;**114**(12):1534-41.
5. Siassakos D, Fox R, Bristowe K, et al. What makes maternity teams effective and safe? Lessons from a series of research on teamwork, leadership and team training. *Acta Obstet Gynecol Scand* 2013;**92**(11):1239-43.
6. Siassakos D, Fox R, Crofts JF, et al. The management of a simulated emergency: Better teamwork, better performance. *Resuscitation* 2011;**82**(2):203-06.
7. Siassakos D, Marshall L, Draycott T. Improving collaboration in maternity with interprofessional learning. *J Midwifery Women's Health* 2011;**56**(2):183.
8. Fransen AF, van de Ven J, Schuit E, et al. Simulation-based team training for multi-professional obstetric care teams to improve patient outcome: a multicentre, cluster randomised controlled trial. *BJOG : an international journal of obstetrics and gynaecology* 2016.
9. Hammick M, Freeth D, Koppel I, et al. A best evidence systematic review of interprofessional education: BEME Guide no. 9. *Med Teach* 2007;**29**(8):735-51.
10. Freeth D, Hammick M, Koppel I, et al. *A critical review of evaluations of interprofessional education*. . London: Learning and Support Network, Centre for Health Sciences and Practice., 2002.
11. Shoushtarian M, Barnett M, McMahon F, et al. Impact of introducing Practical Obstetric Multi-Professional Training (PROMPT) into maternity units in Victoria, Australia. *BJOG Int J Obstet Gynaecol* 2014;**121**(13):1710-18.
12. Kumar A, Nestel D, Stoyles S, et al. Simulation based training in a publicly funded home birth programme in Australia: A qualitative study. *Women Birth* 2016;**29**(1):47-53.
13. Braun V, Clarke V. Using thematic analysis in psychology. *Qualitative Research in Psychology* 2006;**3**(2):77-101.
14. Bosse HM, Mohr J, Buss B, et al. The benefit of repetitive skills training and frequency of expert feedback in the early acquisition of procedural skills. *BMC Med Educ* 2015;**15**(1).
15. Lewin K. *Frontiers in Group Dynamics: Concept, Method and Reality in Social Science; Social Equilibria and Social Change*. Hum Relat 1947;**1**(1):5-41.
16. Cornthwaite K, Edwards S, Siassakos D. Reducing risk in maternity by optimising teamwork and leadership: An evidence-based approach to save mothers and babies. *Best Pract Res Clin Obstet Gynaecol* 2013;**27**(4):571-81.
17. Cooper S, Cant R, Connell C, et al. Measuring teamwork performance: Validity testing of the Team Emergency Assessment Measure (TEAM) with clinical resuscitation teams. *Resuscitation* 2016;**101**:97-101.
18. Bergh AM, Baloyi S, Pattinson RC. What is the impact of multi-professional emergency obstetric and neonatal care training? *Best Pract Res Clin Obstet Gynaecol* 2015;**29**(8):1028-43.
19. Ameh CA, Van Den Broek N. Making It Happen: Training health-care providers in emergency obstetric and newborn care. *Best Pract Res Clin Obstet Gynaecol* 2015;**29**(8):1077-91.
20. Weiner CP, Collins L, Bentley S, et al. Multi-professional training for obstetric emergencies in a US hospital over a 7-year interval: An observational study. *Journal of Perinatology* 2016;**36**(1):19-24.

- 1
- 2
- 3 21. Bajaj K, Rivera-Chiauszi EY, Lee C, et al. Validating Obstetric Emergency Checklists using
- 4 Simulation: A Randomized Controlled Trial. American Journal of Perinatology 2016.
- 5 22. Crofts JF, Winter C, Sowter MC. Practical simulation training for maternity care-where we are and
- 6 where next. BJOG Int J Obstet Gynaecol 2011;**118**(SUPPL. 3):11-16.
- 7 23. Gillan C, Lovrics E, Halpern E, et al. The evaluation of learner outcomes in interprofessional
- 8 continuing education: A literature review and an analysis of survey instruments. Med Teach
- 9 2011;**33**(9):e461-e70.
- 10 24. Calvert KL, McGurgan PM, Debenham EM, et al. Emergency obstetric simulation training: How do
- 11 we know where we are going, if we don't know where we have been? Aust New Zealand J
- 12 Obstet Gynaecol 2013;**53**(6):509-16.
- 13 25. Draycott T, Crofts J. Structured team training in obstetrics and its impact on outcome. Fetal
- 14 Matern Med Rev 2006;**17**(3):229-37.
- 15 26. Freeth D, Hammick M, Reeves S, et al. *Effective Interprofessional Education: Development,*
- 16 *Delivery and Evaluation*: Blackwell Publishing Ltd, 2008.
- 17
- 18
- 19
- 20
- 21
- 22
- 23
- 24
- 25
- 26
- 27
- 28
- 29
- 30
- 31
- 32
- 33
- 34
- 35
- 36
- 37
- 38
- 39
- 40
- 41
- 42
- 43
- 44
- 45
- 46
- 47
- 48
- 49
- 50
- 51
- 52
- 53
- 54
- 55
- 56
- 57
- 58
- 59
- 60



**Table 1: Modified Kirkpatrick's framework (adapted from Barr's six level classification)**

|          |                                   |                                                                             |
|----------|-----------------------------------|-----------------------------------------------------------------------------|
| Level 1  | Participant reaction              | Learners' views on the learning experience and its interprofessional nature |
| Level 2a | Change in attitudes               | Changes in attitudes towards team members of the interprofessional groups   |
| Level 2b | Change in knowledge or skills     | Including knowledge and skills related to the interprofessional activity    |
| Level 3  | Behavioural change                | Identify individual transfer of interprofessional learning                  |
| Level 4a | Change in organizational practice | Wider change in organisational practice and delivery of care                |
| Level 4b | Change in clinical outcome        | Improvement in change in patient care                                       |

\* Adapted with permission from Barr *et al*<sup>2</sup>

**Table 2: Learning acquired from the PROMPT program**

| Theme                                | Responses | Comments                                                                                                                                                                                                                                                                                                                                                                                                                                                                                                                                                                    |
|--------------------------------------|-----------|-----------------------------------------------------------------------------------------------------------------------------------------------------------------------------------------------------------------------------------------------------------------------------------------------------------------------------------------------------------------------------------------------------------------------------------------------------------------------------------------------------------------------------------------------------------------------------|
| Communication                        | 87        | <p><i>“Allocating task to a certain individual and not to someone!”</i></p> <p><i>“Use closed loop communication”</i></p> <p><i>“Use team members’ names”</i></p> <p><i>“Use specific terminology”</i></p> <p><i>“Effective communication between team members leads to effective management”</i></p> <p><i>“Communication becomes even more important in an emergency situation”</i></p> <p><i>“Asking who is in charge (of the situation)”</i></p> <p><i>“To ask what's happening for documentation, to tell when observations/anything is to be done”</i></p>            |
| Knowledge of equipment and procedure | 78        | <p><i>“I learnt where things are kept so they can be accessed immediately in an emergency”</i></p> <p><i>“Familiarity with the ward and procedures to initiate emergency responses”</i></p> <p><i>“Need to spend time learning to hook up the resuscitation cot to the gases in birth rooms”</i></p> <p><i>“Using the resuscitaire, turning it on”</i></p> <p><i>“Familiarise yourself with the content of the emergency boxes”</i></p> <p><i>“It was difficult to find the equipment like the IV pump for the simulation. I understand we need to know where these</i></p> |

|                                             |           |                                                                                                                                                                                                                                                                                                                                                                                                                                                                                                                                      |
|---------------------------------------------|-----------|--------------------------------------------------------------------------------------------------------------------------------------------------------------------------------------------------------------------------------------------------------------------------------------------------------------------------------------------------------------------------------------------------------------------------------------------------------------------------------------------------------------------------------------|
|                                             |           | <i>things are.”</i>                                                                                                                                                                                                                                                                                                                                                                                                                                                                                                                  |
| <b>Learning leadership and followership</b> | <b>73</b> | <p><i>“Put hand up if free when already completed a task in an emergency situation”</i></p> <p><i>“It’s ok to not have a job and wait”</i></p> <p><i>“Learned to identify the importance of clarifying leadership role in every scenario”</i></p> <p><i>“Step in with a helicopter leader role”</i></p> <p><i>“Ask who is the leader/what is going on/what can I do?”</i></p> <p><i>“I needed to be more assertive as team leader”</i></p> <p><i>“Clear instructions and explicitly determining who the emergency leader is”</i></p> |
| <b>Supportive learning environment</b>      | <b>68</b> | <p><i>“Useful to practise these things in team prior to the real deal”</i></p> <p><i>“It consolidated training/knowledge that I have come across in pieces”</i></p> <p><i>“It identifies my weaknesses so I can work on them”</i></p> <p><i>“Learning about eclampsia and PPH in a relaxed environment”</i></p>                                                                                                                                                                                                                      |
| <b>Realism in simulation</b>                | <b>48</b> | <p><i>“Having a serious actress helped to keep it real”</i></p> <p><i>“Stay calm in a stressful emergency”</i></p> <p><i>“Practical experience of emergencies we don’t normally get to manage”</i></p>                                                                                                                                                                                                                                                                                                                               |
| <b>Interprofessional roles and teamwork</b> | <b>46</b> | <p><i>“Teamwork improves working together”</i></p> <p><i>“My specific role as a RMO (junior doctor) in an emergency situation....”</i></p>                                                                                                                                                                                                                                                                                                                                                                                           |

|                       |           |                                                                                                                                                                                                                                                                                                                                                                         |
|-----------------------|-----------|-------------------------------------------------------------------------------------------------------------------------------------------------------------------------------------------------------------------------------------------------------------------------------------------------------------------------------------------------------------------------|
|                       |           | <p><i>"....taking on roles/tasks that I can do instead of RMO"</i></p> <p><i>"That you could have a small role that makes up effective care"</i></p>                                                                                                                                                                                                                    |
| <b>Prioritisation</b> | <b>33</b> | <p><i>"(checking) Fetal heart rate during eclamptic fit is not a priority"</i></p> <p><i>"Think of first line of management in a maternity emergency"</i></p> <p><i>"IV fluids very important in PPH, possibly more than drugs"</i></p> <p><i>"The importance of airway and fluid resuscitation"</i></p> <p><i>"The first steps in managing an eclamptic woman"</i></p> |

**Table 3:** Shoulder dystocia

|                                | 2011-2012     | 2014-2015     | <i>p-value</i> |
|--------------------------------|---------------|---------------|----------------|
| Cases                          | 268 (1.7%)    | 290 (2.3%)    | <b>0.001</b>   |
| Live born                      | 268 (100%)    | 290 (100%)    | 1.00           |
| Internal manoeuvres            | 51 (19%)      | 54 (19%)      | 0.91           |
| Interval between head and body | 2.0 (IQR 1-3) | 2.0 (IQR 1-2) | <b>0.04</b>    |
| Brachial plexus injury         | 17 (6%)       | 10 (3%)       | 0.12           |
| Fracture*                      | 14 (5%)       | 7 (2%)        | 0.12           |
| Apgar <7 @ 5min                | 21 (8%)       | 15 (5%)       | 0.31           |
| Lactate >8 mg/dL               | 12 (4%)       | 22 (8%)       | 0.16           |
| Admission SCN/NICU             | 87 (32%)      | 74 (26%)      | 0.08           |
| Major perineal trauma          | 31 (12%)      | 27 (9%)       | 0.41           |
| 3 <sup>rd</sup> degree tear    | 28 (10%)      | 26 (9%)       | 0.48           |
| 4 <sup>th</sup> degree tear    | 3 (1%)        | 1 (0.3%)      | 0.36           |
| Management sheet completed     | 63 (24%)      | 48 (17%)      | <b>0.04</b>    |

\* Humerus or clavicle

SCN: special care nursery; NICU: neonatal intensive care unit

**Table 4:** Postpartum haemorrhage 1000-1499 mL

|                                         | 2011-2012   | 2014-2015  | <i>p-value</i> |
|-----------------------------------------|-------------|------------|----------------|
| Cases                                   | 561 (3.7%)  | 511 (4.1%) | 0.09           |
| CS                                      | 196 (35%)   | 176 (34%)  | 0.90           |
| Transfer to theatre after vaginal birth | 65 (12%)    | 76 (15%)   | 0.12           |
| IV access before theatre                | 260 (99.6%) | 252 (100%) | 1.00           |
| Bakri balloon                           | 2 (0.4%)    | 6 (1%)     | 0.16           |
| ICU admission                           | 0           | 3 (0.6%)   | 0.12           |
| RBC transfusion                         | 65 (12%)    | 75 (15%)   | 0.15           |

CS: caesarean section; ICU: intensive care unit; RBC: red blood cells

**Table 5:** Postpartum haemorrhage >1500mL

|                                         | 2011-2012   | 2014-2015   | <i>p-value</i> |
|-----------------------------------------|-------------|-------------|----------------|
| Cases                                   | 329 (2.2%)  | 287 (2.3%)  | 0.48           |
| CS                                      | 101 (31%)   | 64 (22%)    | <b>0.03</b>    |
| Transfer to theatre after vaginal birth | 99 (30%)    | 108 (38%)   | <b>0.049</b>   |
| IV access before theatre                | 199 (99.5%) | 171 (99.4%) | 1.00           |
| Bakri balloon                           | 21 (6%)     | 34 (12%)    | <b>0.02</b>    |
| ICU admission                           | 23 (7%)     | 24 (8.3%)   | 0.55           |
| RBC transfusion                         | 156 (47%)   | 149 (52%)   | 0.29           |

CS: caesarean section; ICU: intensive care unit; RBC: red blood cells

### Figure Legend

**Figure 1:** Bar diagrams showing level of knowledge (Q1), confidence (Q2) or prior experience (Q3) of medical staff (top panel) and midwifery staff (bottom panel) in dealing with eclampsia, shoulder dystocia, neonatal resuscitation (NLS) and postpartum haemorrhage (PPH).

1-5 on the y- axis denotes likert scale rating, where 5 is the highest rating.

For peer review only



1  
2  
3  
4  
5  
6  
7  
8  
9  
10  
11  
12  
13  
14  
15  
16  
17  
18  
19  
20  
21  
22  
23  
24  
25  
26  
27  
28  
29  
30  
31  
32  
33  
34  
35  
36  
37  
38  
39  
40  
41  
42  
43  
44  
45  
46  
47  
48  
49  
50  
51  
52  
53  
54  
55  
56  
57  
58  
59  
60



64x80mm (300 x 300 DPI)

STROBE Statement for PROMPT study  
(Research checklist)

|                    |                                                |                |
|--------------------|------------------------------------------------|----------------|
| Title and Abstract | Study design                                   | Page2          |
|                    | Summary of the study provided                  | Page 2 and 3   |
| Introduction       | Background                                     | Page 4 and 5   |
|                    | Objectives                                     | Page 5         |
| Methods            | Study design                                   | Page 5         |
|                    | Setting                                        | Page 5 and 6   |
|                    | Eligibility criteria                           | Page 6         |
|                    | Variables (outcome measures)                   | Page 6 and 7   |
|                    | Data sources/measurement                       | Page 7 and 8   |
|                    | Bias                                           | Page 6 and 7   |
|                    | Study size                                     | Page 5,6 and 7 |
|                    | Quantitative variables                         | Page 7 and 8   |
|                    | Statistical analysis                           | Page 7 and 8   |
|                    | Qualitative analysis                           | Page 6 and 7   |
| Results            | Descriptive data - demography                  | Page 8         |
|                    | Main results - Thematic (qualitative) analysis | Page 8-13      |
|                    | Main results - quantitative                    | Page 13 and 14 |
|                    | Other results                                  | Page 8         |
| Discussion         | Key results                                    | Page 14 - 16   |
|                    | Limitations                                    | Page 16 and 17 |
|                    | Interpretation                                 | Page 17 and 18 |
|                    | Generalisability                               | Page 17 and 18 |
|                    | Funding                                        | Page 19        |
|                    |                                                |                |
